# Supplementary material
Source: publisher figshare collection journal article supplement (https://acs.figshare.com/ndownloader/files/5025430)
Supplement: Supplementary file 1 [file 5025430]

# Supporting Information

## **Oxygen Evolution Reaction Dynamics, Faradaic Charge Efficiency, and the Active Metal Redox States of Ni-Fe Oxide Water Splitting Electrocatalysts**

Mikaela Görli<sup>1</sup>, Petko Chernev<sup>2</sup>, Jorge Ferreira de Araújo<sup>1</sup>, Tobias Reier<sup>1</sup>, Sören Dres<sup>1</sup>, Benjamin Paul<sup>1</sup>, Ralph Krähnert<sup>1</sup>, Holger Dau<sup>2</sup>, and Peter Strasser<sup>1</sup>

<sup>1</sup> Technical University of Berlin, Chemical Engineering, Straße des 17. Juni 124, 10623, Berlin, Germany

<sup>2</sup> Free University of Berlin, Department of Physics, Arnimallee 14, 14195 Berlin, Germany

Contacts:

pstrasser@tu-berlin.de

holger.dau@fu-berlin.de

# S1. Electrochemical characterization

## S1.1. OER activity

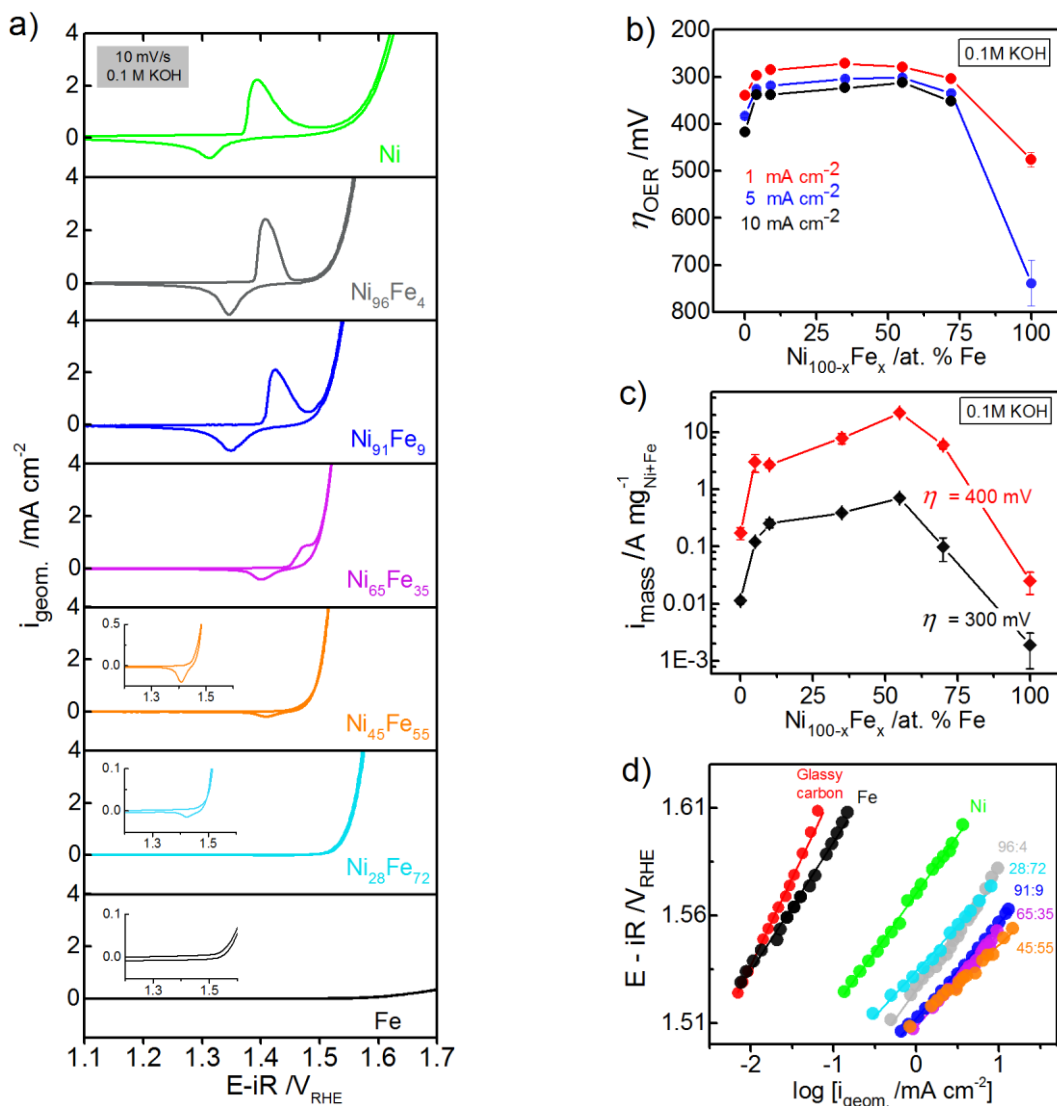

**Figure S1.** (a) CVs measured at 10 mV/s in rotating disk electrode (RDE) setup after an initial pre-conditioning step of 1.63  $V_{\text{RHE}}$  for 30 min in 0.1 M KOH. (b) Overpotential ( $\eta_{\text{OER}}$ ) at 1, 5, and 10  $\text{mA cm}^{-2}$ , extracted from chronopotentiometric measurements. (c) Mass activity ( $i_{\text{mass}}$ ) based on the total metal loading obtained by ICP-OES. (d) Tafel plots obtained from quasi-stationary state measurements by applying a stable potential for 90 s in 0.1 M KOH. The catalyst composition,  $\text{Ni}_{100-x}\text{Fe}_x$ , is indicated as atomic %. The total geometric metal loading was determined by ICP-OES prior to the measurements, kept at  $\sim 10 \mu\text{g Ni+Fe cm}^{-2}$  in the presented measurements. The rotation speed was set to 1600 rpm.

## S1.2. The effect of applying reducing potential

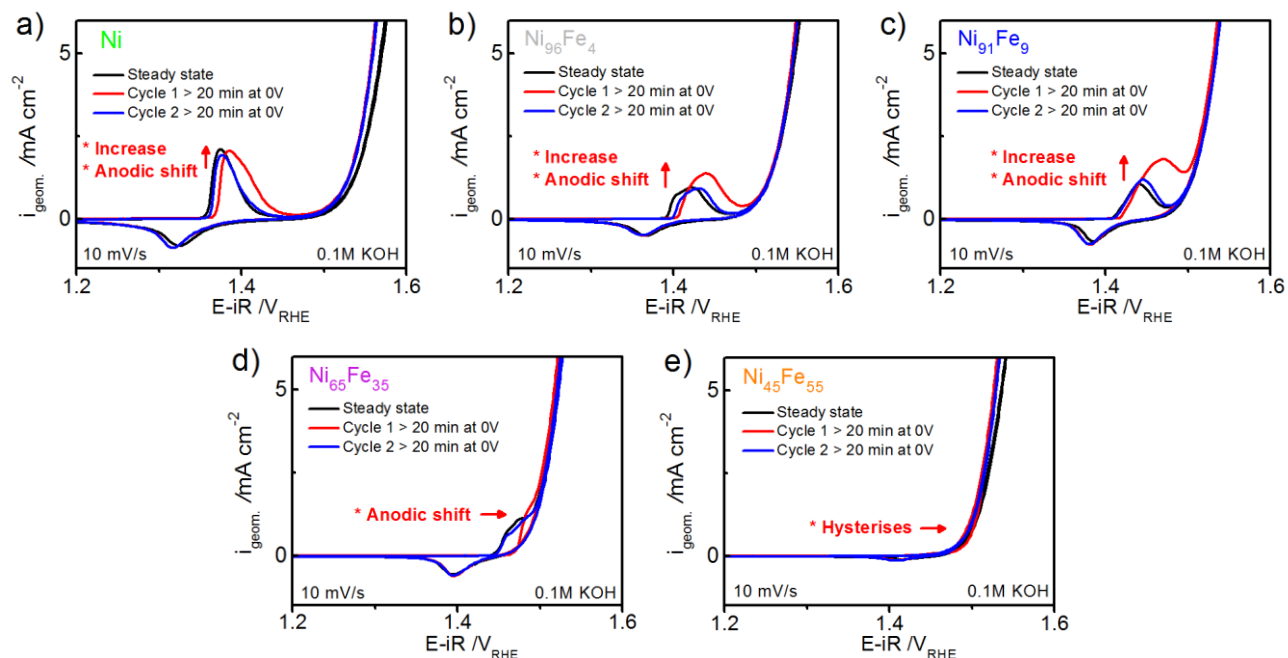

**Figure S2.** CVs measured before and after application of a reducing potential ( $0 \text{ V}_{\text{RHE}}$ ) for 20 min to make sure all Ni centers were in the reduced state, according to the principle presented by Batchellor et al <sup>1</sup>. (a) The Ni catalyst (b)  $\text{Ni}_{96}\text{Fe}_4$  (c)  $\text{Ni}_{91}\text{Fe}_9$  (d)  $\text{Ni}_{65}\text{Fe}_{35}$  (e)  $\text{Ni}_{45}\text{Fe}_{55}$ . CVs were recorded in RDE setup at a scan-rate of 10 mV/s, a rotation speed of 1600 rpm, and a metal loading of  $\sim 6 \mu\text{g Ni+Fe cm}^{-2}$ . The catalyst composition ( $\text{Ni}_{100-x}\text{Fe}_x$ ) is given as atomic %.

### S1.3. Conditioning of catalysts

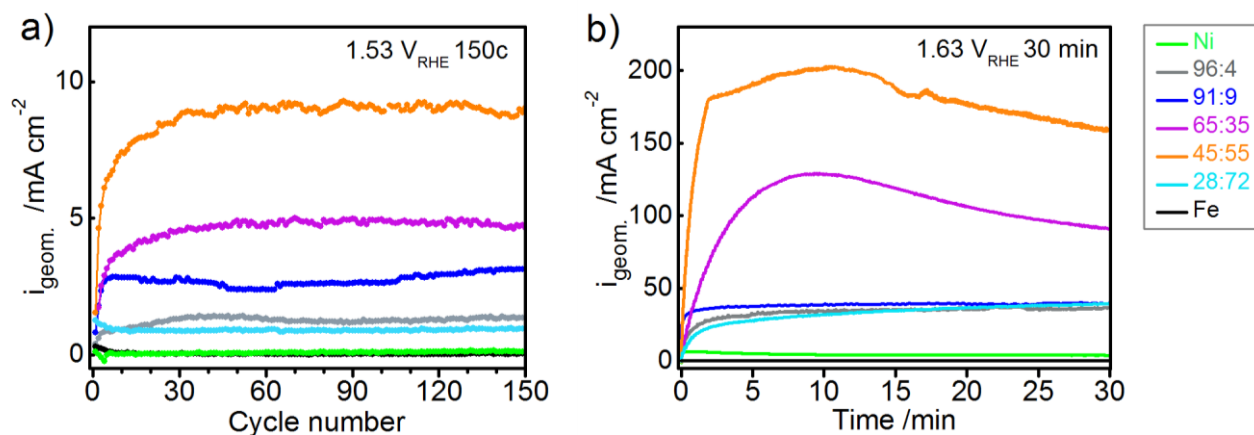

**Figure S3.** Evaluation of the OER activity during potentiodynamic and potentiostatic conditioning. **(a)** Geometric current densities ( $i_{\text{geom.}}$ ) extracted at  $1.53 \text{ V}_{\text{RHE}}$  during the first 150 cycles, collected at a scan-rate of  $100 \text{ mV/s}$ . **(b)** Application of  $1.63 \text{ V}_{\text{RHE}}$  for 30 min according to the conditioning protocol for the quasi-in situ XAS measurements. The measurements in (b) were carried out at iR-corrected potentials. Measurements were carried out in RDE setup in  $0.1 \text{ M KOH}$ . The metal loading was  $\sim 10 \mu\text{g Ni+Fe cm}^{-2}$ . The catalyst composition ( $\text{Ni}_{100-x}\text{Fe}_x$ ) is given as atomic %.

## S1.4. Dynamic redox changes

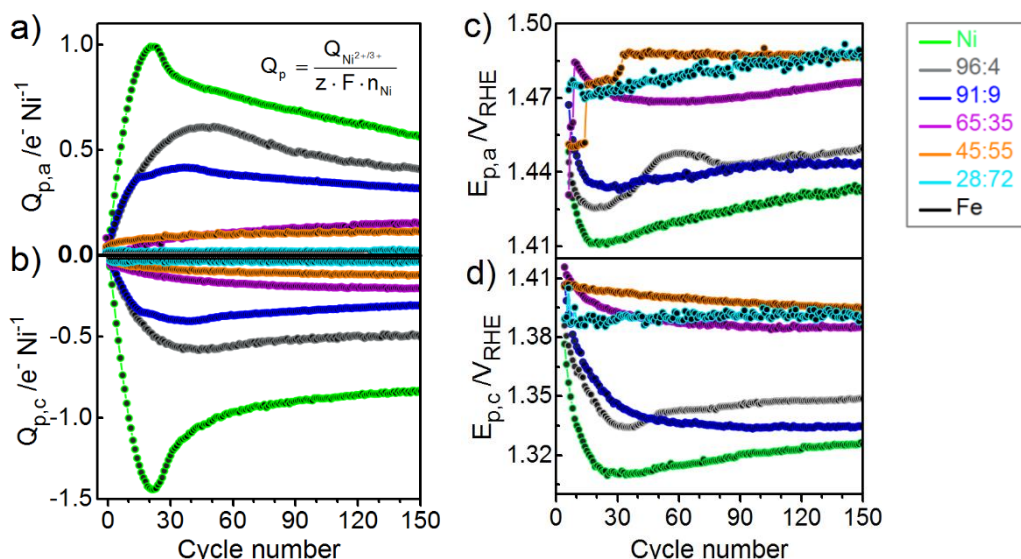

**Figure S4.** Evaluation of the Ni(OH)<sub>2</sub>/NiOOH redox peak during the first 150 cycles; **(a)** Anodic redox electrons ( $Q_{p,a}$ ) defined as electrons transferred per Ni atoms ( $e^- \text{ Ni}^{-1}$ ) **(b)** Cathodic redox electrons ( $Q_{p,c}$ ) **(c)** Anodic peak potential ( $E_{p,a}$ ) **(d)** Cathodic peak potential ( $E_{p,c}$ ). The value of  $Q$  was estimated based on the moles of Ni on the electrode determined prior to the measurement using ICP-OES. Measurements were carried out in RDE setup in 0.1 M KOH, at a scan-rate 100 mV/s at a rotation speed of 1600 rpm, and a metal loading of  $\sim 10 \mu\text{g Ni+Fe cm}^{-2}$ . The catalyst composition (Ni<sub>100-x</sub>Fe<sub>x</sub>) is indicated as atomic %.

### S1.4.1. Mass corrected redox electrons

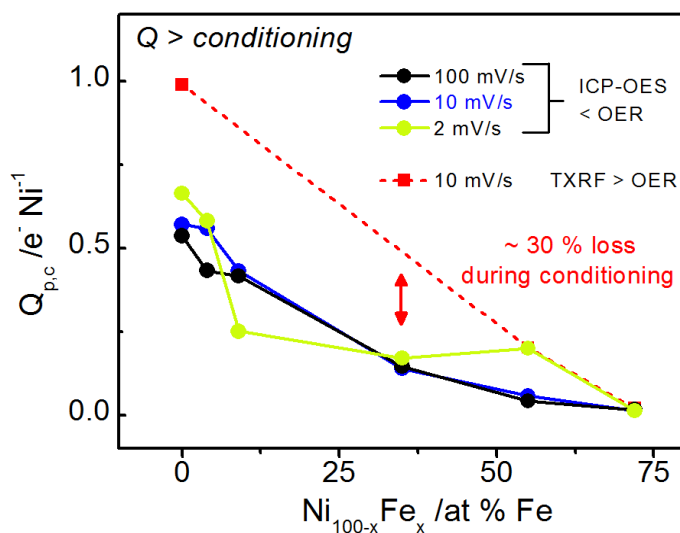

**Figure S5.** Evaluation of redox electrons ( $e^- \text{Ni}^{-1}$ ) for the cathodic  $\text{Ni}(\text{OH})_2/\text{NiOOH}$  redox peak estimated after application of  $1.63V_{\text{RHE}}$  for 30 min in 0.1 M KOH. The integration was done at different scan-rates (100, 10, and 2 mV/s). The values of  $Q$  were estimated based on the total moles of Ni on the electrodes determined of as-prepared catalysts prior to the measurements using ICP-OES (< OER), and based on the total moles of Ni on the electrodes after the conditioning step determined using TXRF analysis (> OER).

## S1.5. Impact of Fe impurities

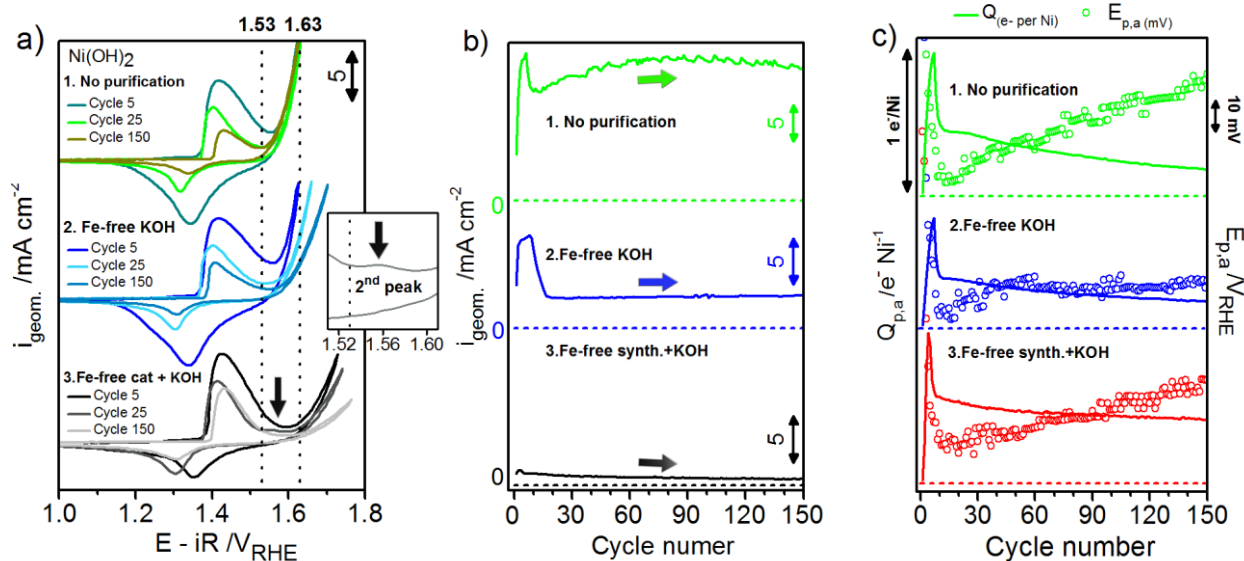

**Figure S6.** The Ni.catalyst ( $\alpha$ -Ni(OH)<sub>2</sub>) measured in 0.1 M KOH at different levels of Fe-impurities. **(a)** CVs of the Ni catalyst prepared without further purification measured in non-purified KOH **(1.)** Ni catalyst measured in Fe-free 0.1 M KOH **(2.)** Ni-catalyst prepared with purified chemicals measured in Fe-free 0.1 M KOH **(3.)**. Displayed CVs are cycle 5, 25 and 150. The inset shows an additional redox peak visible at ~1.56 V at cycle 25 **(b)** Geometric current density at 1.63 V<sub>RHE</sub> during the first 150 cycles for the catalysts shown in (a). **(c)** Integrated anodic redox electrons ( $e^-$  per Ni) and the corresponding anodic peak position ( $E_{\text{p,a}}$ ) during the first 150 cycles of the catalysts presented in (a). All measurements were recorded in RDE setup at 1600 rpm at a scan-rate of 100 mV/s using electrochemical cells made of polypropylene (Nalgene®) to avoid Fe-contamination. The geometric metal loading was  $\sim 5 \mu\text{g Ni+Fe cm}^{-2}$  determined by ICP-OES. All purifications were carried out according to the method reported by Trotochaud et al. <sup>3</sup>.

## S2. Differential Electrochemical Mass Spectrometry (DEMS)

### S2.1. DEMS; Voltage domain

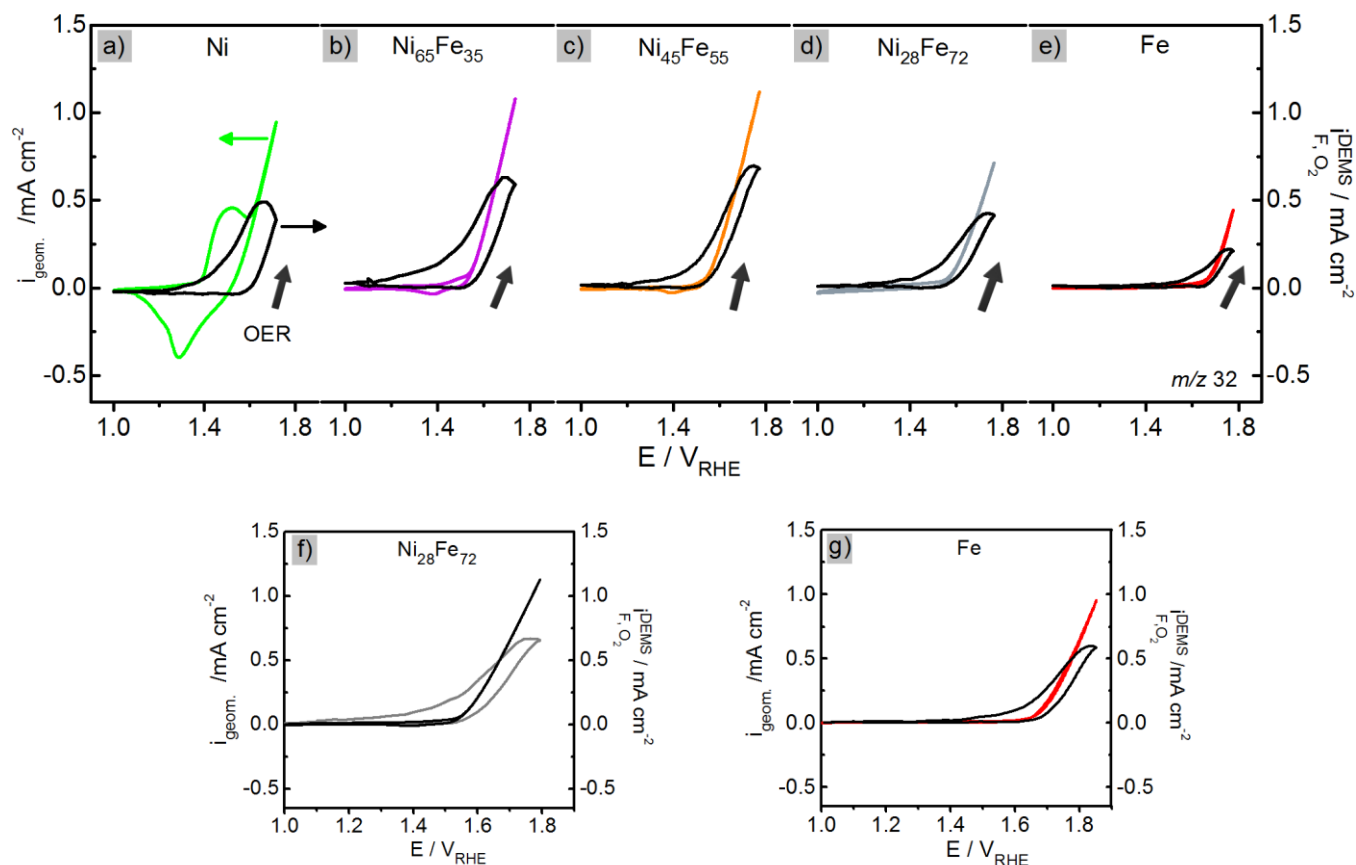

**Figure S7.** Differential electrochemical mass spectrometry (DEMS) measured in 0.1 M KOH using a dual thin-layer flow-cell. CVs were recorded at 50 mV/s between 1-1.8  $V_{\text{RHE}}$  (before iR-comp.). (a) Ni catalyst (b)  $\text{Ni}_{65}\text{Fe}_{35}$  (c)  $\text{Ni}_{45}\text{Fe}_{55}$  (d)  $\text{Ni}_{28}\text{Fe}_{72}$  (e) Fe catalyst. In order to reach higher current densities for some of the less active catalysts, CVs were recorded with increased scan-limits ( $\sim 2.0$   $V_{\text{RHE}}$  before iR-comp.) of (f)  $\text{Ni}_{28}\text{Fe}_{72}$  and (g) Fe catalyst. Geometric current density from the potentiostat (CVs) are shown as *colored lines* (left axis) and the mass spectrometric faradaic ion current of  $\text{O}_2$  ( $m/z$  32) are shown as *black lines* (right axis). The arrows pointing upwards indicate the scan direction of the DEMS trace. A calibration constant ( $K^*$ ) was used to convert the integrated ion current to faradaic current. More information is given in Experimental section 2.6. The catalyst composition ( $\text{Ni}_{100-x}\text{Fe}_x$ ) is given as atomic %.



## S2.2. DEMS; Time domain

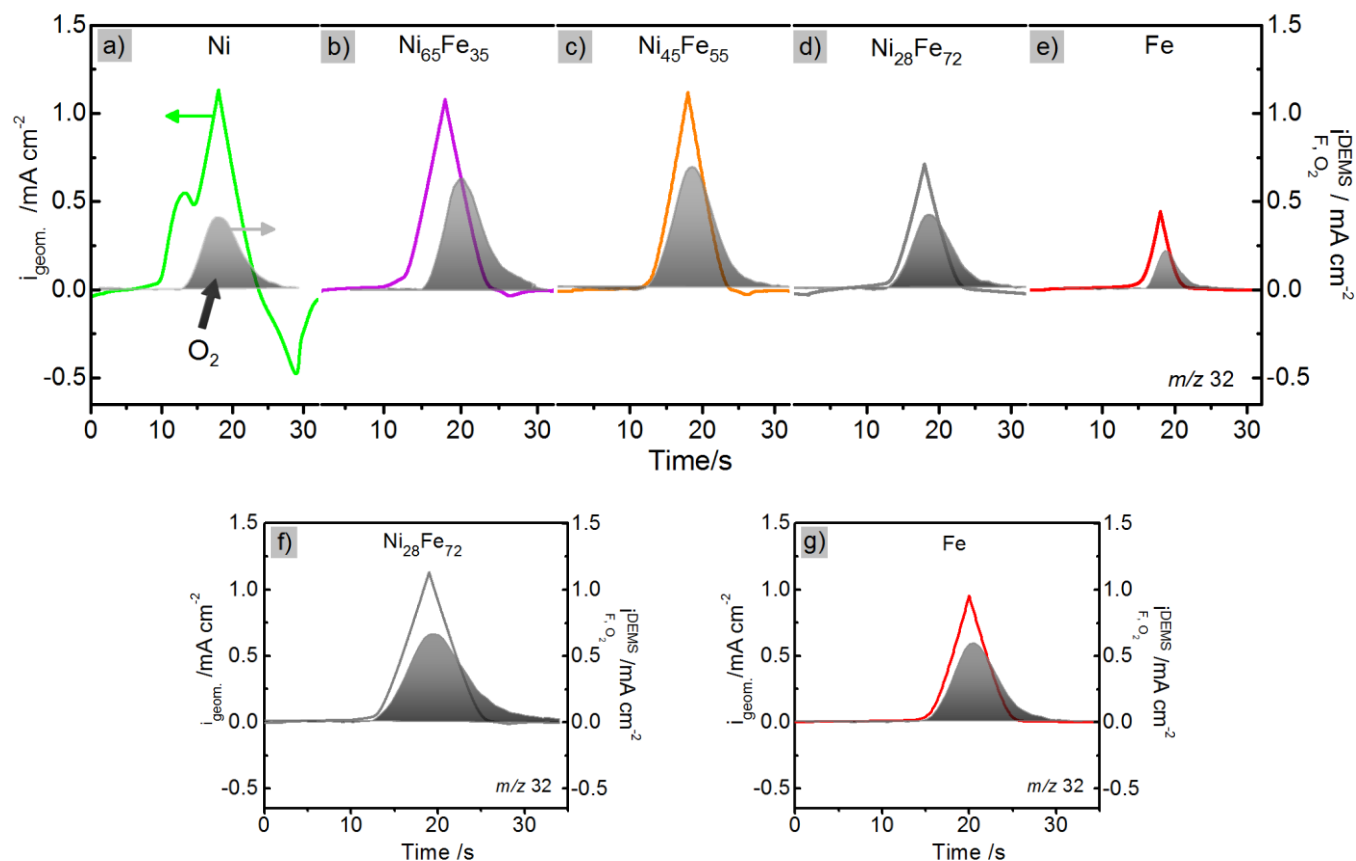

**Figure S8.** DEMS traces of the CVs in Fig. S7 shown in the time domain, measured in 0.1 M KOH using a dual thin-layer flow-cell. CVs were recorded at 50 mV/s between 1-1.8  $V_{RHE}$  (before iR-comp.) and are shown for selected catalysts; (a) Ni (b)  $Ni_{65}Fe_{35}$  (c)  $Ni_{45}Fe_{55}$  (d)  $Ni_{28}Fe_{72}$  (e) Fe. In order to reach higher current densities for less active catalysts CVs were recorded with increased scan-limits ( $\sim 2.0 V_{RHE}$  before iR-comp.) of (f)  $Ni_{28}Fe_{72}$  and (g) Fe catalyst. The CVs are shown as *colored lines* (left axis) and the mass spectrometric faradaic ion current of  $O_2$  ( $m/z$  32) as *black lines* (right axis). The arrows indicate the scan direction of the DEMS trace. A calibration constant ( $K^*$ ) was used to convert the integrated ion current to faradaic current. More information is given in Experimental section 2.6. The catalyst composition ( $Ni_{100-x}Fe_x$ ) is given as atomic %.

### S2.3. Faradaic efficiency - extended potential-limits

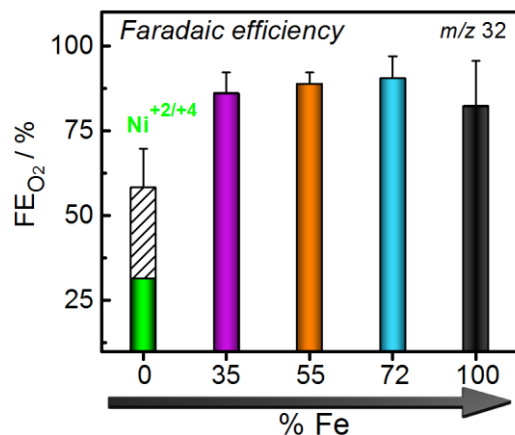

**Figure S9.** Faradaic efficiency (FE) for mixed Ni-Fe catalysts with efficiencies of the Ni<sub>28</sub>Fe<sub>72</sub> and Fe-catalysts re-evaluated based on the measurements with extended scan-limits shown in Fig. S7f-g and S8f-g, scanned up to ~ 2.0 V<sub>RHE</sub> (before iR-comp.) to reach higher current densities.

## S2.4. Faradaic efficiency equations

$$\frac{Q_{F,jO_2}^{DEMS}}{Q_{F,O_2}^{DEMS} + Q_{F,Ni^{+3/+4}}} = 0.6 \quad (S1)$$

$$0.4 Q_{F,O_2}^{DEMS} = Q_{F,Ni^{+3/+4}} \quad (S2)$$

$$\frac{Q_{F,O_2}^{DEMS}}{Q_{F,O_2}^{DEMS} + Q_{F,Ni^{+2/+3}} + Q_{F,Ni^{+3/+4}}} = 0.33 \quad (S3)$$

$$1.6 Q_{F,O_2}^{DEMS} = Q_{F,Ni^{+2/+3}} \quad (S4)$$

$$\frac{Q_{F,Ni^{+3/+4}}}{Q_{F,Ni^{+2/+3}}} = \frac{1}{4} \quad (S5)$$

### S3. X-ray diffraction

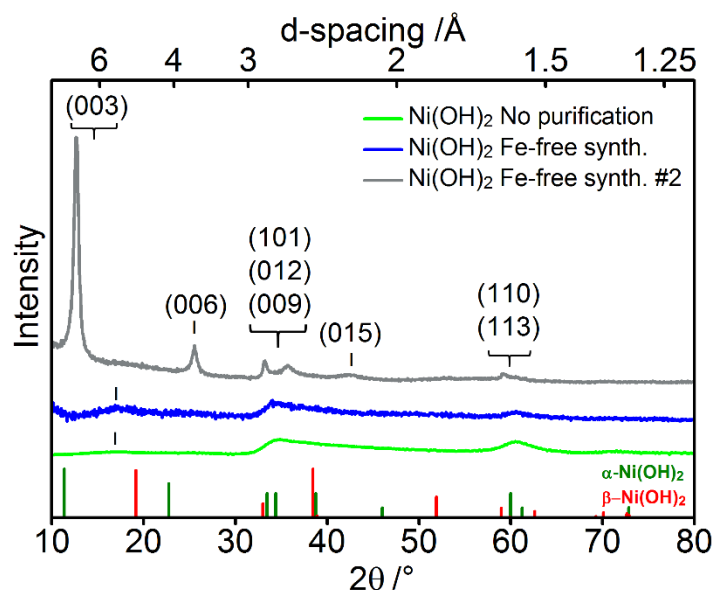

**Figure S10.** XRD of the as-prepared Ni catalyst; prepared with as-received chemicals (green curve), Fe-Free Ni catalyst prepared with purified chemicals (blue curve), and a slightly different Ni catalyst prepared with purified chemicals and a modified synthesis protocol (grey curve). Further details are given in the Experimental section 2.1. The lines at the bottom show reference patterns of  $\alpha$ -Ni(OH)<sub>2</sub> (red, pdf # 00-038-0715) and  $\beta$ -Ni(OH)<sub>2</sub> (dark green, pdf # 01-074-2075). Removal of trace Fe (purification) was carried out according to the method reported by Trotochaud et al.<sup>3</sup>.

## S4. SEM-EDX elemental analysis

### S4.1. SEM of Ni and Fe catalysts

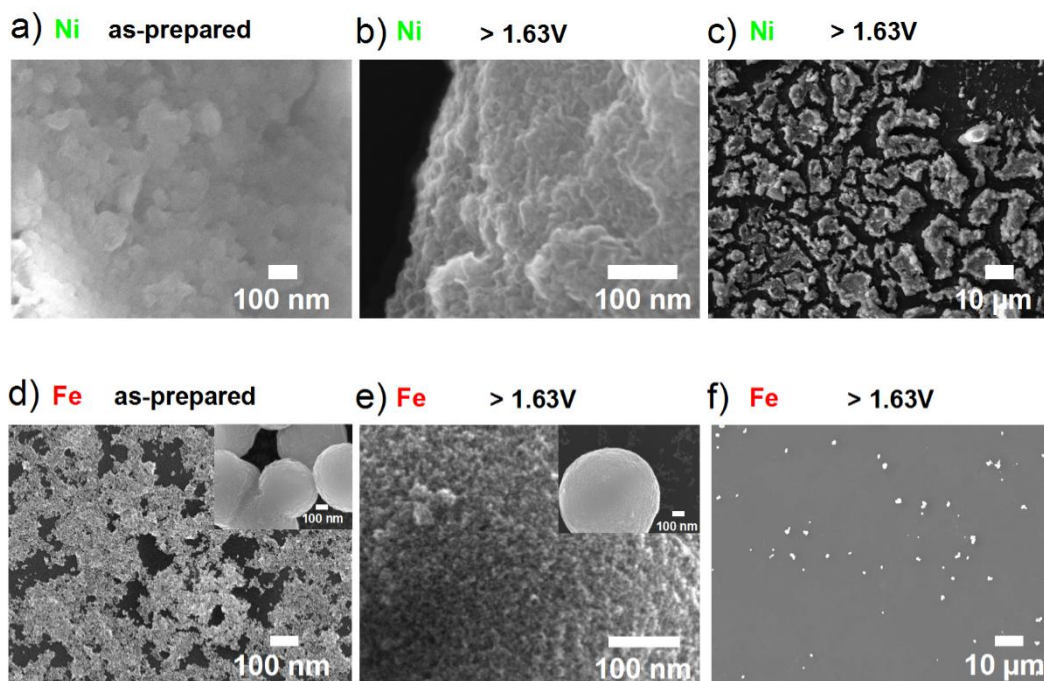

**Figure S11.** SEM images of catalysts drop-casted on glassy carbon electrodes; **(a)** as-prepared Ni catalyst **(b-c)** Ni catalyst after application of 1.63 V for 30 min in 0.1 M KOH (as received) shown at different magnifications. **(d)** As-prepared Fe catalyst. The inset shows large agglomerates of small Fe particles. **(e-f)** Fe catalyst after application of 1.63 V for 30 min in 0.1 M KOH (as received) shown at different magnifications. The inset in (d) shows a large Fe agglomerate.

## S4.2. EDX elemental mapping of Ni<sub>45</sub>Fe<sub>55</sub>

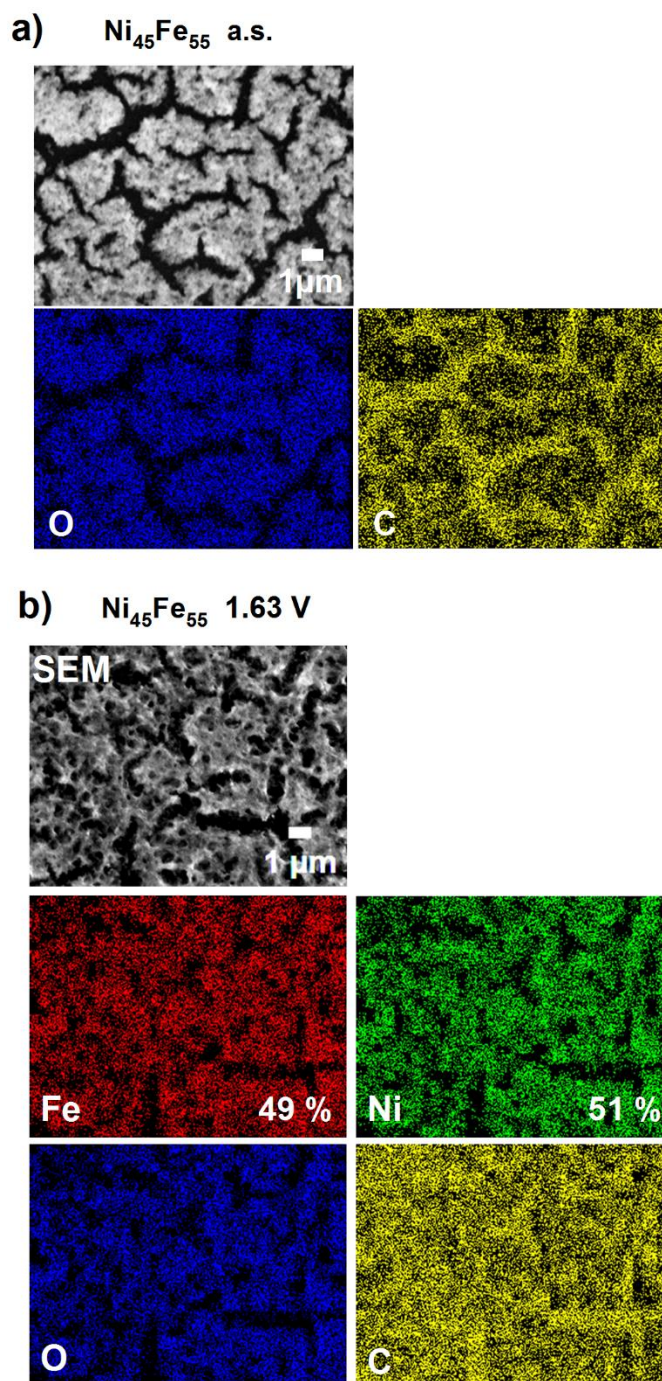

**Figure S12.** SEM images and EDX elemental mapping of the Ni<sub>45</sub>Fe<sub>55</sub> catalyst drop casted on a glassy carbon electrode. (a) O and C content of the as-prepared catalyst (b) O, C, Ni, and Fe content of the catalyst shown in (a) after conditioning at 1.63 V for 30 min in 0.1 M KOH. The elements in the EDX mappings are indicated with colors; Ni (green), Fe (red), and O (blue), C (yellow).

### S4.3. EDX line-scan analysis of $\text{Ni}_{45}\text{Fe}_{55}$

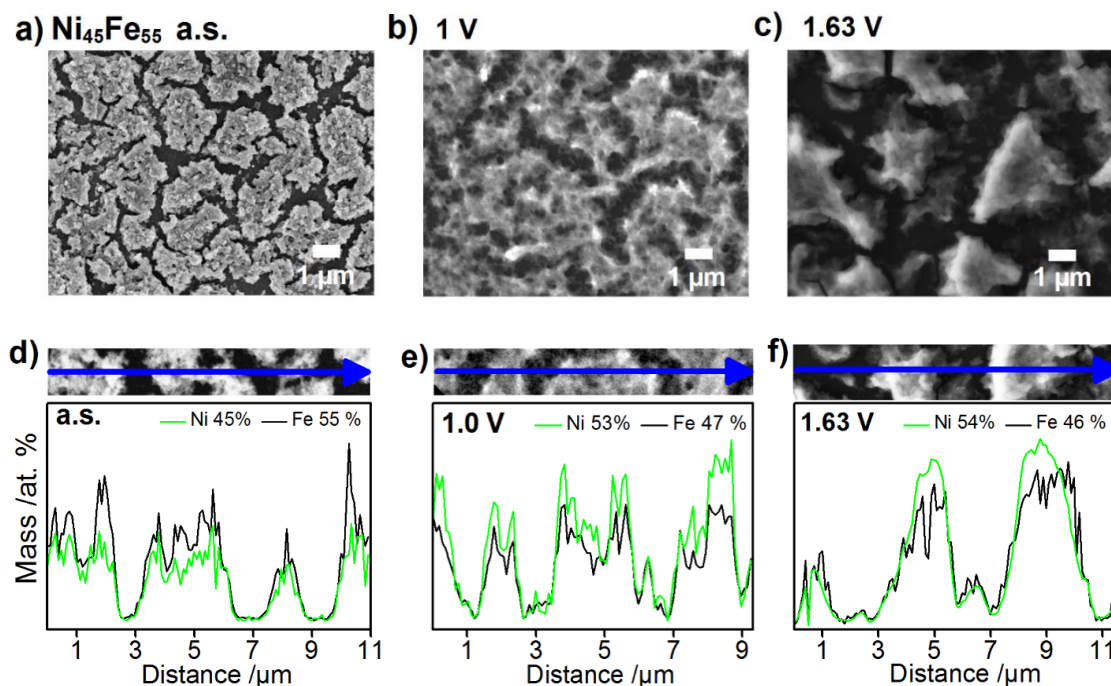

**Figure S13.** SEM images of the  $\text{Ni}_{45}\text{Fe}_{55}$  catalysts drop-casted on glassy carbon electrodes **(a)** as-prepared catalyst (a.s.) **(b)** after application of 1.0  $V_{\text{RHE}}$  for 30 min in 0.1 M KOH **(c)** after application of 1.63  $V_{\text{RHE}}$  for 30 min in 0.1 M KOH. The catalysts in (a-c) were further analyzed using energy dispersive X-ray line-scan analysis to determine the atomic composition of Ni and Fe across a selected path (blue arrow) **(d)** as-prepared **(e)** conditioned at 1.0 V **(f)** conditioned at 1.63 V.

## S5. Quasi-in situ X-ray absorption spectroscopy

### S5.1. Ni and Fe XANES

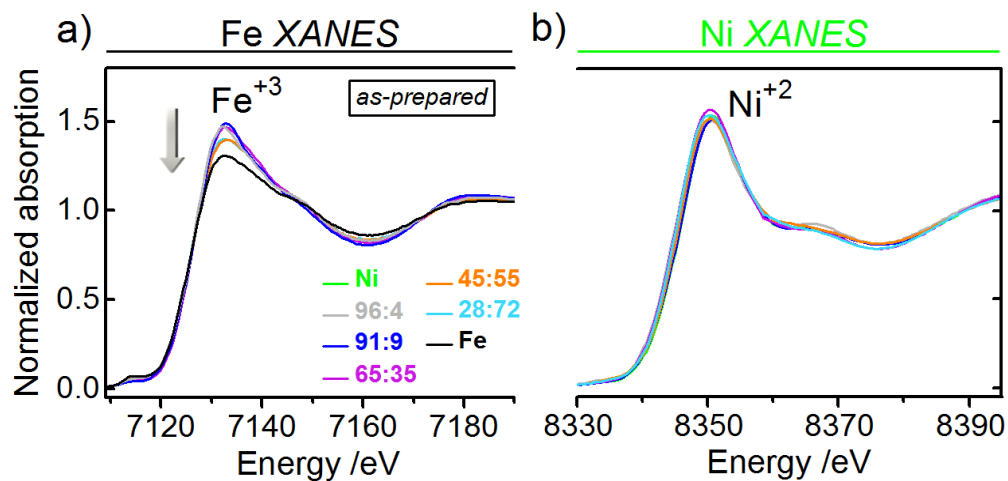

**Figure S14.** X-ray absorption near edge spectra (XANES) of as-prepared catalysts. **(a)** Fe *K*-edges **(b)** Ni *K*-edges. The catalyst composition,  $\text{Ni}_{100-x}\text{Fe}_x$ , is indicated as atomic % in the legend shown in (a) which applies to both Fe and Ni *K*-edges.



## S5.2. Fourier transformed EXAFS

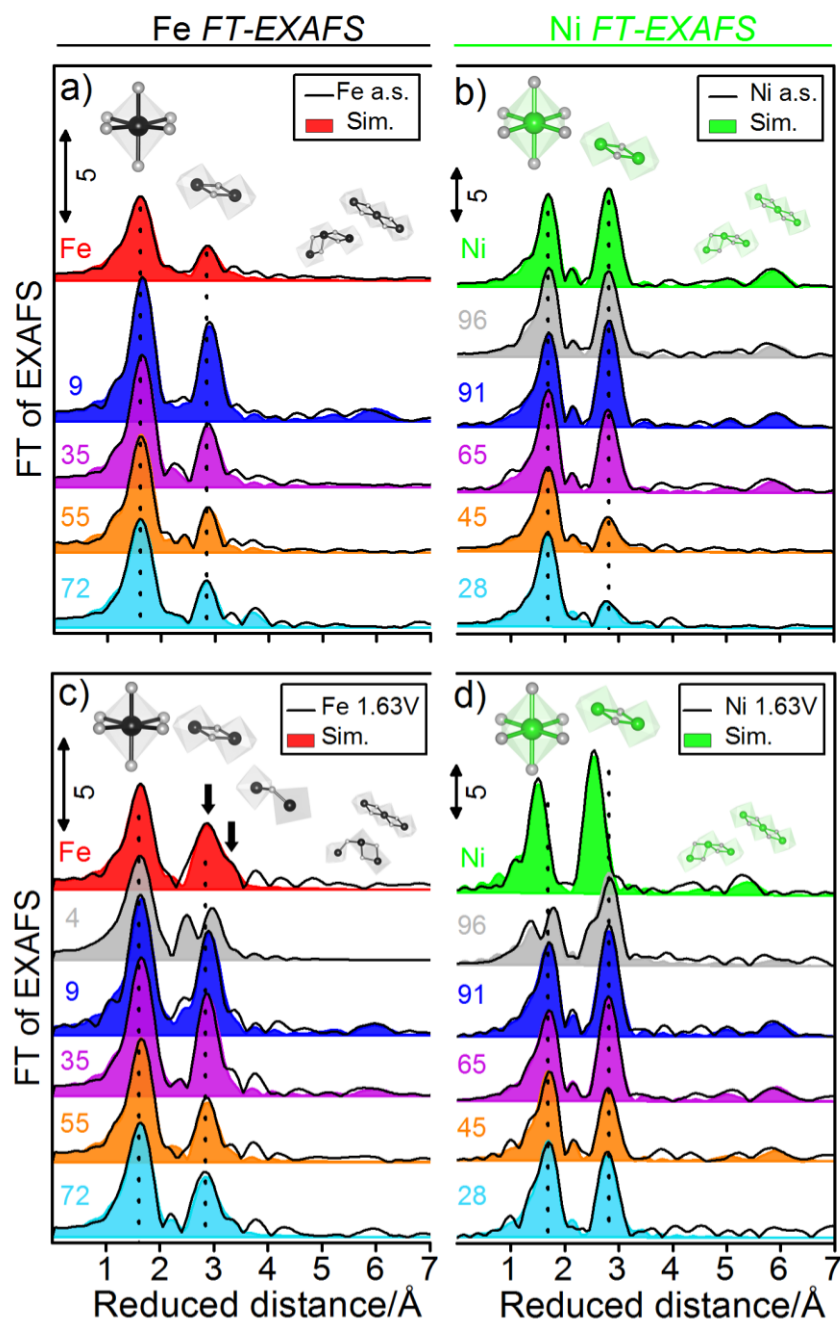

**Figure S15.** Fourier transformed  $k^3$ -weighted EXAFS spectra. Experimental data (*black curves*) and simulations (*colored shaded areas*) at the (a) Ni K-edge of as-prepared catalysts (a.s.) (b) Fe K-edge of as-prepared catalysts (c) Ni K-edge of catalysts freeze-quenched at 1.63 V (d) Fe K-edge of catalysts frozen at 1.63 V. The catalyst composition,  $\text{Ni}_{100-x}\text{Fe}_x$ , is indicated as atomic % Fe or Ni for the respective edge. Catalysts were freeze quenched under applied potential after conditioning at the given potential for 30 min in 0.1 M KOH. Fit parameters are listed in Tables S2-S5.

### S5.3. Extended X-ray absorption spectroscopy

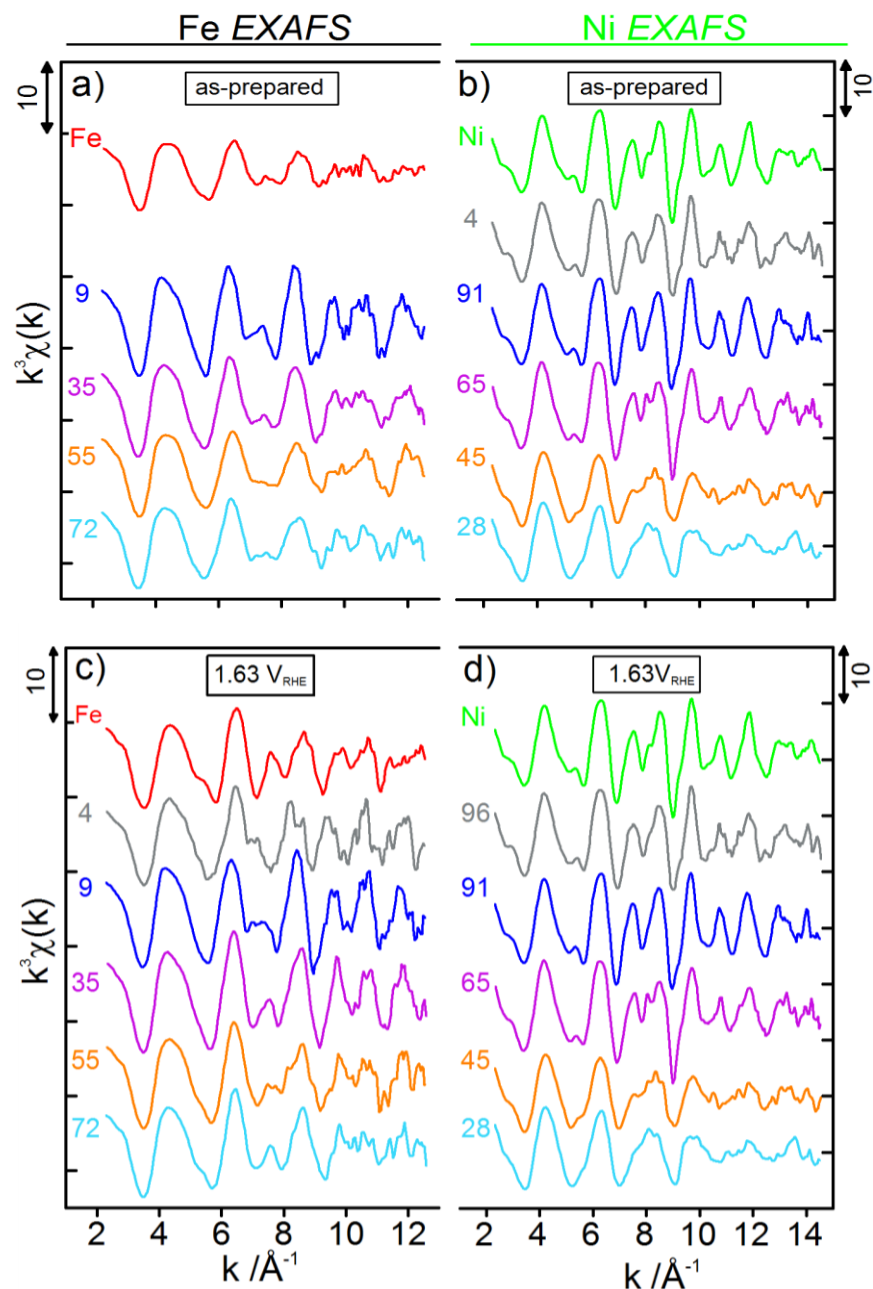

**Figure S16.** Extended X-ray absorption fine structure (EXAFS) (a) Fe *K*-edge of as-prepared catalysts (b) Ni *K*-edge of as-prepared catalysts (c) Fe *K*-edge of catalysts freeze quenched at 1.63 V. (d) Ni *K*-edge of catalysts freeze quenched at 1.63 V. The catalyst composition ( $\text{Ni}_{100-x}\text{Fe}_x$ ) is indicated as atomic % Fe or Ni for the respective *K*-edges. Catalysts were frozen under applied potential after conditioning at the given potential for 30 min in 0.1 M KOH.

## S5.4. XAS trends vs. catalyst composition

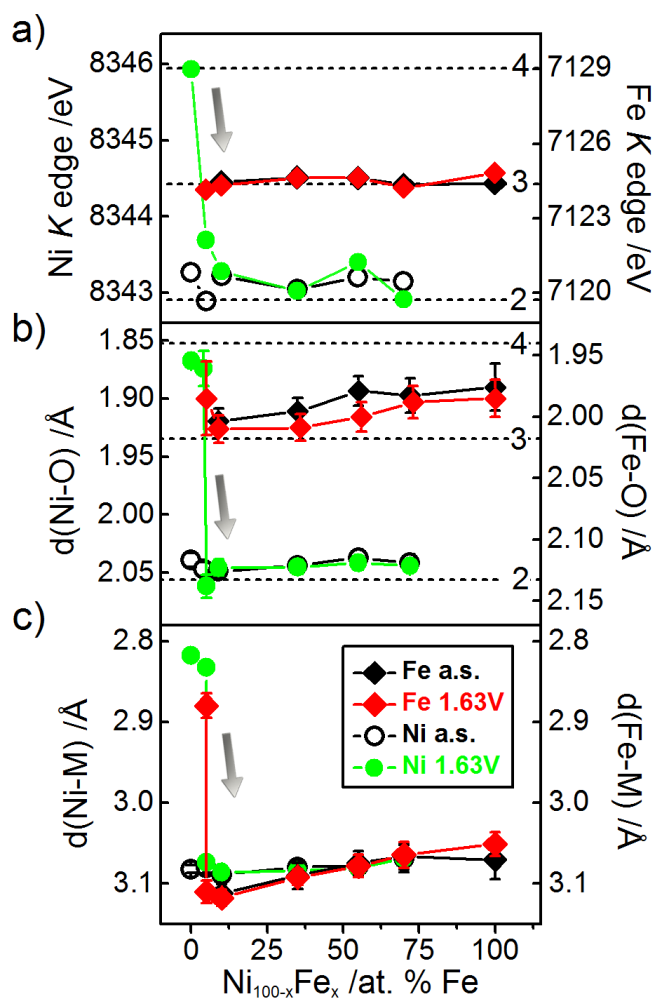

**Figure S17.** Trends obtained from the fitted XAS spectra as a function of Fe-content **(a)** Ni and Fe *K*-edge positions. **(b)** M-O coordination distances **(c)** M-M coordination distances. The dotted lines in (a)-(b) indicate the oxidation states determined from reference compounds presented in Tables S8-9. The values in (b-c) were obtained by the fitting  $k^3$ -weighted EXAFS oscillations in  $k$ -space between  $2.6\text{-}14\text{ \AA}^{-1}$  at the Ni *K*-edge and  $2.6\text{-}12.5\text{ \AA}^{-1}$  at the Fe *K*-edge. Fit parameters are listed in Tables S1-S5.

## S5.5. Quasi-in situ XAS at different potentials

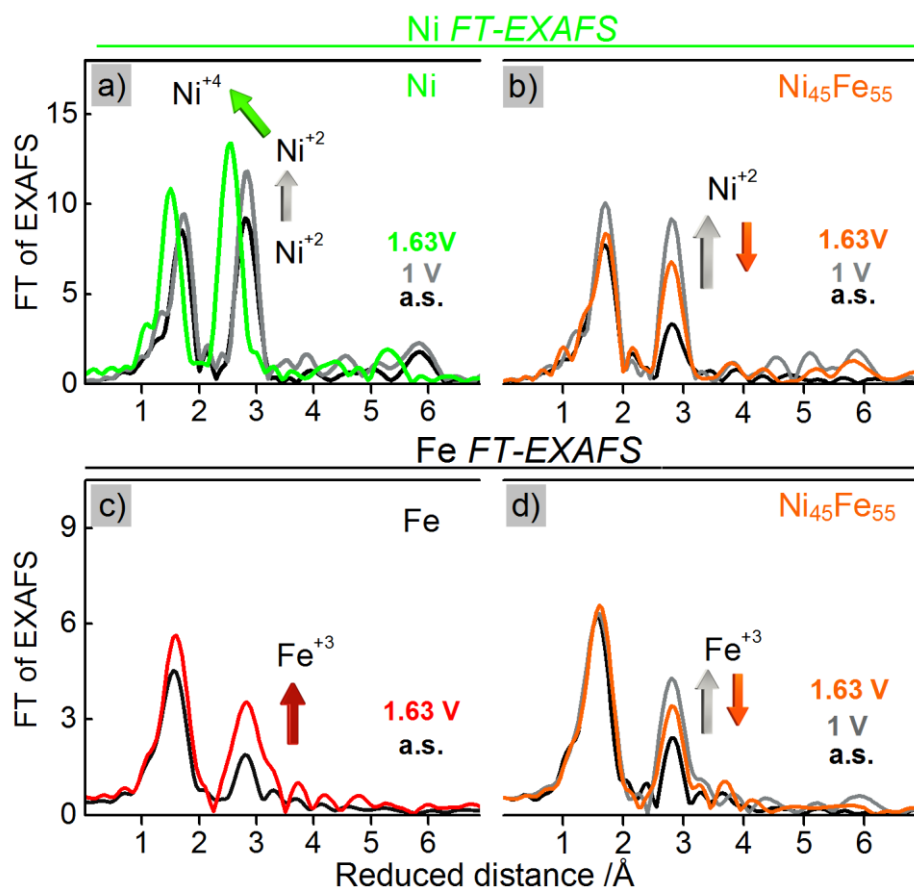

**Figure S18.** The  $k^3$ -weighted FT-EXAFS at the Ni K-edges of the (a) Ni catalyst and (b)  $\text{Ni}_{45}\text{Fe}_{55}$  catalyst, and at the Fe K-edges of the (c) Fe catalyst and (d)  $\text{Ni}_{45}\text{Fe}_{55}$ . Data is shown for the as-prepared catalysts (a.s., *black curves*), and catalysts frozen at 1.0 V<sub>RHE</sub> (*grey curves*), and catalysts frozen at 1.63 V<sub>RHE</sub> (*colored curves*). Catalysts were frozen at the given potential after conditioning for 30 min in 0.1 M KOH.

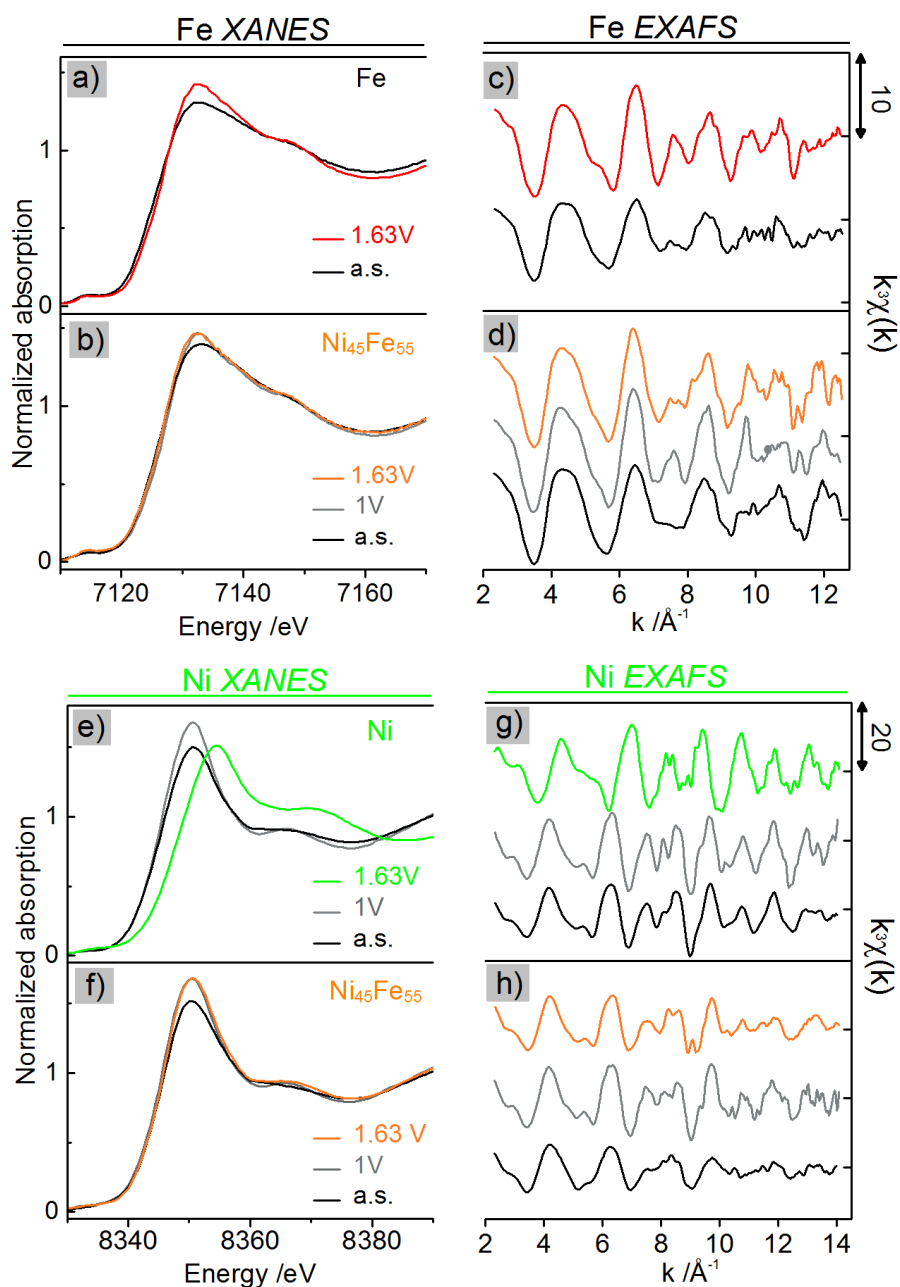

**Figure S19.** Fe *K*-edge XANES of (a) Fe catalyst and (b) Ni<sub>45</sub>Fe<sub>55</sub>, and Fe EXAFS oscillations of (c) Fe catalyst and (d) Ni<sub>45</sub>Fe<sub>55</sub>. Ni *K*-edge XANES of (e) Ni catalyst and (f) Ni<sub>45</sub>Fe<sub>55</sub>, and Ni EXAFS oscillations of (g) Ni catalyst and (h) Ni<sub>45</sub>Fe<sub>55</sub>. Shown are as-prepared catalysts (a.s., *black curves*), freeze quenched at 1.0 V<sub>RHE</sub> (*grey curves*), and freeze quenched at 1.63 V<sub>RHE</sub> (*colored curves*). The catalyst composition, Ni<sub>100-x</sub>Fe<sub>x</sub> is given as at. %. Catalysts were freeze-quenched under applied potential after conditioning at the given potential for 30 min in 0.1 M KOH.

## S6. XAS simulations & tables of fit parameters

The  $k^3$  weighted EXAFS spectra were extracted using  $E_0 = 8333$  eV for the Ni *K*-edge and  $E_0 = 7117$  eV for the Fe *K*-edge. The simulations were carried out using in-house software (SimX) with phase functions generated from atomic coordinates of layered  $\alpha$ -Ni(OH)<sub>2</sub>,  $\gamma$ -NiOOH and  $\gamma/\alpha$ -FeOOH using FEFF version 9.1 with self-consistent field option switched on<sup>4,5</sup>. An amplitude reduction factor  $S_0^2$  of 0.85 was used at both the Ni and Fe *K*-edges. The fits were carried out in *k*-space with a range of 25-750 eV above  $E_0$  (*k*-range of 2.6 -14 Å<sup>-1</sup>) for the Ni *K*-edge and 25-600 eV (*k*-range of 2.6-12.5 Å<sup>-1</sup>) for the Fe *K*-edge. A global fit approach was used, where Debye-Waller factors of each Ni/Fe-M shell had the same value for all as-prepared catalysts and another value for all freeze-quenched catalysts. To account for variations in catalyst composition of the mixed Ni-Fe catalysts arising from variations in the phase functions associated with either Ni or Fe absorbers, each M-M shell was split into a M-Ni and M-Fe shell with a ratio between them set equal to the actual atomic Ni:Fe ratio determined by ICP-OES. To simulate the FT peaks at reduced distance 5-6 Å, a shell corresponding to three collinearly arranged metal atoms, Ni/Fe-M-M, was added to the simulation of some of the catalysts, with a shell distance set equal to double the corresponding Ni/Fe-M distance; the shell included multiple-scattering contributions and contributions from three metal atoms arranged at an angle of 120° (see the insets of Figure S15 for the corresponding structural motifs). Two additional shells at 2.86 Å and at 3.45 Å were required in order to achieve a reasonable fit quality in the freeze-quenched catalysts and were included at both Ni and Fe *K*-edges; the two distances had the same value in all freeze-quenched catalysts in the global fit. The fit parameters were optimized by the least squares method using a Levenberg-Marquardt algorithm; parameter errors were determined from the covariance matrix of the fit and correspond to 68 % confidence intervals.

## S6.1. Tables of XAS parameters

**Table S1.** Ni and Fe *K*-edge positions of as-prepared catalysts (a.s.) and catalysts freeze-quenched at 1.63 V after conditioning for 30 min in 0.1 M KOH, with corresponding average oxidation states determined from a comparison to reference compounds presented in Tables S8-9.

| <b>Ni<sub>100-x</sub>Fe<sub>x</sub></b><br><b>/at. %</b> | <b>Ni <i>K</i>-edge</b>          |                            |                                    |                            | <b>Fe <i>K</i>-edge</b>          |                            |                                   |                            |
|----------------------------------------------------------|----------------------------------|----------------------------|------------------------------------|----------------------------|----------------------------------|----------------------------|-----------------------------------|----------------------------|
|                                                          | <b>Pos. (a.s.)</b><br><b>/eV</b> | <b>Ox.</b><br><b>state</b> | <b>Pos. (1.63 V)</b><br><b>/eV</b> | <b>Ox.</b><br><b>state</b> | <b>Pos. (a.s.)</b><br><b>/eV</b> | <b>Ox.</b><br><b>state</b> | <b>Pos. (1.63V)</b><br><b>/eV</b> | <b>Ox.</b><br><b>state</b> |
| <b>Ni<sub>100</sub>Fe<sub>0</sub></b>                    | 8343.3                           | 2.2                        | 8345.9                             | 4.0                        | -                                | -                          | -                                 | -                          |
| <b>Ni<sub>96</sub>Fe<sub>4</sub></b>                     | 8342.9                           | 2.0                        | 8343.7                             | 2.6                        | -                                | -                          | 7124.2                            | 2.9                        |
| <b>Ni<sub>91</sub>Fe<sub>9</sub></b>                     | 8343.2                           | 2.2                        | 8343.3                             | 2.3                        | 7124.5                           | 3.0                        | 7124.3                            | 3.0                        |
| <b>Ni<sub>65</sub>Fe<sub>35</sub></b>                    | 8343.0                           | 2.1                        | 8343.0                             | 2.1                        | 7124.7                           | 3.1                        | 7124.6                            | 3.1                        |
| <b>Ni<sub>45</sub>Fe<sub>55</sub></b>                    | 8343.4                           | 2.2                        | 8343.3                             | 2.3                        | 7124.6                           | 3.1                        | 7124.7                            | 3.1                        |
| <b>Ni<sub>28</sub>Fe<sub>72</sub></b>                    | 8343.2                           | 2.2                        | 8342.9                             | 2.0                        | 7124.4                           | 3.0                        | 7124.2                            | 3.0                        |
| <b>Ni<sub>0</sub>Fe<sub>100</sub></b>                    | -                                | -                          | -                                  | -                          | 7124.4                           | 3.0                        | 7124.9                            | 3.1                        |

*K*-edge positions (pos.) were obtained by the integral method reported by Dau et al.<sup>6</sup> The catalyst composition is given as atomic %, rounded to the nearest integer.

**Table S2.** Fe *K*-edge EXAFS simulation parameters of as-prepared catalysts (a.s.). The fitted *k*-range was 2.6-12.5 Å<sup>-1</sup>.

| Fe <i>K</i> -edge as-prepared         |        |                   |           |              |                      |                |
|---------------------------------------|--------|-------------------|-----------|--------------|----------------------|----------------|
| Ni <sub>100-x</sub> Fe <sub>x</sub>   | Shell  | R / Å             | CN        | σ / Å        | ΔE <sub>0</sub> / eV | R <sub>f</sub> |
| <b>Ni<sub>0</sub>Fe<sub>100</sub></b> | Fe-O   | 1.98 ± 0.02       | 4.4 ± 0.9 | 0.10 ± 0.02  | 0.4                  | 14.5           |
|                                       | Fe-M   | 3.07 ± 0.02       | 2.6 ± 1.1 | 0.09 ± 0.01* |                      |                |
| <b>Ni<sub>91</sub>Fe<sub>9</sub></b>  | Fe-O   | 2.00 ± 0.01       | 5.9 ± 0.8 | 0.08 ± 0.01  | 0.8                  | 11.7           |
|                                       | Fe-M   | 3.11 ± 0.01       | 6.0 ± 1.6 | 0.09 ± 0.01* |                      |                |
|                                       | Fe-M-M | 6.22 <sup>†</sup> | 1.5 ± 1.2 | 0.09 ± 0.01* |                      |                |
| <b>Ni<sub>65</sub>Fe<sub>35</sub></b> | Fe-O   | 2.00 ± 0.01       | 5.6 ± 0.8 | 0.08 ± 0.01  | 0.8                  | 12.2           |
|                                       | Fe-M   | 3.09 ± 0.02       | 3.5 ± 0.8 | 0.09 ± 0.01* |                      |                |
| <b>Ni<sub>45</sub>Fe<sub>55</sub></b> | Fe-O   | 1.98 ± 0.01       | 4.8 ± 0.7 | 0.08 ± 0.01  | 0.4                  | 15.2           |
|                                       | Fe-M   | 3.08 ± 0.02       | 3.8 ± 0.7 | 0.09 ± 0.01* |                      |                |
| <b>Ni<sub>28</sub>Fe<sub>72</sub></b> | Fe-O   | 1.98 ± 0.01       | 5.3 ± 0.9 | 0.09 ± 0.01  | 0.5                  | 16.7           |
|                                       | Fe-M   | 3.07 ± 0.02       | 3.0 ± 0.9 | 0.09 ± 0.01* |                      |                |

\* Debye-Waller parameters (σ) of Fe-M shells that had the same value in a global fit approach.

<sup>†</sup> Coordination distance of the Fe-M-M shell was set equal to double the Fe-M distance.

Debye-Waller parameters, coordination distances (R) and coordination numbers (CN) were kept unrestricted unless indicated. Catalyst composition is given as atomic %, rounded to the nearest integer.



**Table S3.** Ni *K*-edge EXAFS simulation parameters of as-prepared catalysts (a.s.). The fitted *k*-range was 2.6-14 Å<sup>-1</sup>.

| Ni <i>K</i> -edge as-prepared         |        |                   |           |              |                      |                |
|---------------------------------------|--------|-------------------|-----------|--------------|----------------------|----------------|
| Ni <sub>100-x</sub> Fe <sub>x</sub>   | Shell  | R / Å             | CN        | σ / Å        | ΔE <sub>0</sub> / eV | R <sub>f</sub> |
| <b>Ni<sub>100</sub>Fe<sub>0</sub></b> | Ni-O   | 2.04 ± 0.01       | 5.2 ± 0.5 | 0.07 ± 0.01  | 1.4                  | 13.1           |
|                                       | Ni-M   | 3.08 ± 0.01       | 6.3 ± 0.4 | 0.07 ± 0.01* |                      |                |
|                                       | Ni-M-M | 6.16 <sup>†</sup> | 2.6 ± 0.6 | 0.07 ± 0.01* |                      |                |
| <b>Ni<sub>96</sub>Fe<sub>4</sub></b>  | Ni-O   | 2.05 ± 0.01       | 5.6 ± 0.5 | 0.07 ± 0.01  | 1.9                  | 14.4           |
|                                       | Ni-M   | 3.08 ± 0.01       | 5.5 ± 0.4 | 0.07 ± 0.01* |                      |                |
|                                       | Ni-M-M | 6.16 <sup>†</sup> | 1.9 ± 0.6 | 0.07 ± 0.01* |                      |                |
| <b>Ni<sub>91</sub>Fe<sub>9</sub></b>  | Ni-O   | 2.05 ± 0.01       | 5.7 ± 0.5 | 0.07 ± 0.01  | 1.7                  | 9.9            |
|                                       | Ni-M   | 3.09 ± 0.01       | 6.6 ± 0.4 | 0.07 ± 0.01* |                      |                |
|                                       | Ni-M-M | 6.19 <sup>†</sup> | 2.2 ± 0.6 | 0.07 ± 0.01* |                      |                |
| <b>Ni<sub>65</sub>Fe<sub>35</sub></b> | Ni-O   | 2.04 ± 0.01       | 6.3 ± 0.5 | 0.07 ± 0.01  | 1.6                  | 15.7           |
|                                       | Ni-M   | 3.08 ± 0.01       | 5.5 ± 0.3 | 0.07 ± 0.01* |                      |                |
|                                       | Ni-M-M | 6.16 <sup>†</sup> | 1.8 ± 0.6 | 0.07 ± 0.01* |                      |                |
| <b>Ni<sub>45</sub>Fe<sub>55</sub></b> | Ni-O   | 2.04 ± 0.01       | 5.7 ± 0.5 | 0.08 ± 0.01  | 1.4                  | 16.2           |
|                                       | Ni-M   | 3.08 ± 0.01       | 2.3 ± 0.2 | 0.07 ± 0.01* |                      |                |
| <b>Ni<sub>28</sub>Fe<sub>72</sub></b> | Ni-O   | 2.04 ± 0.01       | 6.4 ± 0.5 | 0.08 ± 0.01  | 1.3                  | 20.2           |
|                                       | Ni-M   | 3.07 ± 0.02       | 1.8 ± 0.3 | 0.07 ± 0.01* |                      |                |

\* Debye-Waller parameters of Ni-M shells that had the same value in a global fit approach.

<sup>†</sup> Coordination distances of the Ni-M-M shell were set equal to double the corresponding Ni-M distance.

Debye-Waller parameters, Coordination distances (R) and coordination numbers (CN) were kept unrestricted. Catalyst composition is given as atomic %, rounded to the nearest integer.

**Table S4.** Fe *K*-edge EXAFS simulation parameters of catalysts freeze quenched at 1.63 V<sub>RHE</sub> after conditioning at the given potential for 30 min in 0.1 M KOH. The fitted *k*-range was 2.6-12.5 Å<sup>-1</sup>.

| Fe <i>K</i> -edge at 1.63 V <sub>RHE</sub> |        |                          |           |              |                      |                |
|--------------------------------------------|--------|--------------------------|-----------|--------------|----------------------|----------------|
| Ni <sub>100-x</sub> Fe <sub>x</sub>        | Shell  | R / Å                    | CN        | σ / Å        | ΔE <sub>0</sub> / eV | R <sub>f</sub> |
| Ni <sub>0</sub> Fe <sub>100</sub>          | Fe-O   | 1.98 ± 0.02              | 5.0 ± 0.9 | 0.09 ± 0.01  | 1.2                  | 20.1           |
|                                            | Fe-M   | 3.05 ± 0.02              | 4.9 ± 1.0 | 0.08 ± 0.01* |                      |                |
|                                            | Fe-M   | 2.86 ± 0.02 <sup>a</sup> | 0.5 ± 0.7 | 0.08 ± 0.01* |                      |                |
|                                            | Fe-M   | 3.45 ± 0.02 <sup>b</sup> | 1.8 ± 0.9 | 0.08 ± 0.01* |                      |                |
| Ni <sub>96</sub> Fe <sub>4</sub>           | Fe-O   | 1.99 ± 0.03              | 5.8 ± 1.0 | 0.10 ± 0.01  | 0.7                  | 23.0           |
|                                            | Fe-M   | 3.11 ± 0.01              | 3.7 ± 0.3 | 0.08 ± 0.01* |                      |                |
|                                            | Fe-M   | 2.88 ± 0.02              | 2.9 ± 0.3 | 0.08 ± 0.01* |                      |                |
|                                            | Fe-M   | 3.45 ± 0.02 <sup>b</sup> | 0.0 ± 5.1 | 0.08 ± 0.01* |                      |                |
| Ni <sub>91</sub> Fe <sub>9</sub>           | Fe-O   | 2.01 ± 0.01              | 6.3 ± 0.8 | 0.09 ± 0.01  | 0.7                  | 15.9           |
|                                            | Fe-M   | 3.12 ± 0.01              | 6.7 ± 1.0 | 0.08 ± 0.01* |                      |                |
|                                            | Fe-M-M | 6.24 <sup>†</sup>        | 1.2 ± 1.1 | 0.08 ± 0.01* |                      |                |
|                                            | Fe-M   | 2.86 ± 0.02 <sup>a</sup> | 1.2 ± 0.8 | 0.08 ± 0.01* |                      |                |
|                                            | Fe-M   | 3.45 ± 0.02 <sup>b</sup> | 0.4 ± 0.8 | 0.08 ± 0.01* |                      |                |
| Ni <sub>65</sub> Fe <sub>35</sub>          | Fe-O   | 2.01 ± 0.01              | 6.2 ± 0.8 | 0.09 ± 0.01  | 1.9                  | 14.4           |
|                                            | Fe-M   | 3.09 ± 0.01              | 6.5 ± 0.8 | 0.08 ± 0.01* |                      |                |
|                                            | Fe-M-M | 6.19 <sup>†</sup>        | 0.6 ± 0.8 | 0.08 ± 0.01* |                      |                |
|                                            | Fe-M   | 2.86 ± 0.02 <sup>a</sup> | 1.1 ± 0.8 | 0.08 ± 0.01* |                      |                |
|                                            | Fe-M   | 3.45 ± 0.02 <sup>b</sup> | 0.2 ± 0.8 | 0.08 ± 0.01* |                      |                |
| Ni <sub>45</sub> Fe <sub>55</sub>          | Fe-O   | 2.00 ± 0.01              | 5.2 ± 0.8 | 0.08 ± 0.01  | 1.7                  | 17.9           |
|                                            | Fe-M   | 3.08 ± 0.01              | 3.7 ± 0.5 | 0.08 ± 0.01* |                      |                |
|                                            | Fe-M   | 2.86 ± 0.02 <sup>a</sup> | 0.5 ± 0.7 | 0.08 ± 0.01* |                      |                |
|                                            | Fe-M   | 3.45 ± 0.02 <sup>b</sup> | 0.3 ± 0.8 | 0.08 ± 0.01* |                      |                |
| Ni <sub>28</sub> Fe <sub>72</sub>          | Fe-O   | 1.99 ± 0.01              | 5.4 ± 0.8 | 0.09 ± 0.01  | 0.8                  | 19.4           |
|                                            | Fe-M   | 3.07 ± 0.02              | 3.5 ± 0.7 | 0.08 ± 0.01* |                      |                |
|                                            | Fe-M   | 2.86 ± 0.02 <sup>a</sup> | 0.0 ± 0.7 | 0.08 ± 0.01* |                      |                |
|                                            | Fe-M   | 3.45 ± 0.02 <sup>b</sup> | 1.2 ± 0.8 | 0.08 ± 0.01* |                      |                |

\* Debye-Waller parameters (σ) of Fe-M shells that ad the same value in a global fit approach.

<sup>†</sup> Coordination distances of the Fe-M-M shell were set equal to double the corresponding Fe-M distance.

The coordination distances (R) of two additional Fe-M shells, <sup>a</sup> and <sup>b</sup>, had the same value in all freeze-quenched catalysts in the global fit.

Debye-Waller parameters, coordination distances and coordination numbers (CN) were kept unrestricted unless indicated. Catalyst composition is given as atomic %, rounded to the nearest integer.

**Table S5.** Ni *K*-edge EXAFS simulation parameters of catalysts freeze quenched at 1.63 V<sub>RHE</sub> after conditioning at the given potential for 30 min in 0.1 M KOH. The fitted k-range was 2.6-14 Å<sup>-1</sup>.

| Ni <i>K</i> -edge at 1.63 V <sub>RHE</sub> |        |                          |           |              |                      |                |
|--------------------------------------------|--------|--------------------------|-----------|--------------|----------------------|----------------|
| Ni <sub>100-x</sub> Fe <sub>x</sub>        | Shell  | R / Å                    | CN        | σ / Å        | ΔE <sub>0</sub> / eV | R <sub>f</sub> |
| Ni <sub>100</sub> Fe <sub>0</sub>          | Ni-O   | 1.88 ± 0.01              | 4.9 ± 0.3 | 0.06 ± 0.01  | 2.6                  | 15.2           |
|                                            | Ni-M   | 2.82 ± 0.01              | 6.3 ± 0.2 | 0.06 ± 0.02* |                      |                |
|                                            | Ni-M-M | 5.64 <sup>†</sup>        | 1.2 ± 0.3 | 0.06 ± 0.02* |                      |                |
|                                            | Ni-M   | 3.45 ± 0.02 <sup>b</sup> | 0.1 ± 0.3 | 0.06 ± 0.02* |                      |                |
| Ni <sub>96</sub> Fe <sub>4</sub>           | Ni-O   | 2.06 ± 0.01              | 4.1 ± 0.2 | 0.07 ± 0.01  | 1.4                  | 24.4           |
|                                            | Ni-O   | 1.87 ± 0.02              | 1.9 ± 0.2 | 0.07 ± 0.01  |                      |                |
|                                            | Ni-M   | 3.07 ± 0.01              | 4.0 ± 0.2 | 0.06 ± 0.02* |                      |                |
|                                            | Ni-M   | 2.83 ± 0.01              | 2.0 ± 0.2 | 0.06 ± 0.02* |                      |                |
|                                            | Ni-M   | 3.45 ± 0.02 <sup>b</sup> | 0.0 ± 0.4 | 0.06 ± 0.02* |                      |                |
| Ni <sub>91</sub> Fe <sub>9</sub>           | Ni-O   | 2.04 ± 0.01              | 6.6 ± 0.5 | 0.07 ± 0.01  | 1.1                  | 15.5           |
|                                            | Ni-M   | 3.09 ± 0.01              | 5.4 ± 0.3 | 0.06 ± 0.02* |                      |                |
|                                            | Ni-M-M | 6.17 <sup>†</sup>        | 1.6 ± 0.5 | 0.06 ± 0.02* |                      |                |
|                                            | Ni-M   | 2.86 ± 0.02 <sup>a</sup> | 0.1 ± 0.3 | 0.06 ± 0.02* |                      |                |
|                                            | Ni-M   | 3.45 ± 0.02 <sup>b</sup> | 0.4 ± 0.4 | 0.06 ± 0.02* |                      |                |
| Ni <sub>65</sub> Fe <sub>35</sub>          | Ni-O   | 2.05 ± 0.01              | 6.6 ± 0.6 | 0.08 ± 0.01  | 1.5                  | 16.6           |
|                                            | Ni-M   | 3.08 ± 0.01              | 4.9 ± 0.2 | 0.06 ± 0.02* |                      |                |
|                                            | Ni-M-M | 6.17 <sup>†</sup>        | 1.8 ± 0.5 | 0.06 ± 0.02* |                      |                |
|                                            | Ni-M   | 2.86 ± 0.02 <sup>a</sup> | 0.0 ± 0.3 | 0.06 ± 0.02* |                      |                |
|                                            | Ni-M   | 3.45 ± 0.02 <sup>b</sup> | 0.2 ± 0.4 | 0.06 ± 0.02* |                      |                |
| Ni <sub>45</sub> Fe <sub>55</sub>          | Ni-O   | 2.04 ± 0.01              | 5.6 ± 0.5 | 0.07 ± 0.01  | 2.1                  | 24.8           |
|                                            | Ni-M   | 3.08 ± 0.01              | 3.3 ± 0.1 | 0.06 ± 0.02* |                      |                |
|                                            | Ni-M-M | 6.16 <sup>†</sup>        | 1.3 ± 0.5 | 0.06 ± 0.02* |                      |                |
|                                            | Ni-M   | 2.86 ± 0.02 <sup>a</sup> | 0.0 ± 0.3 | 0.06 ± 0.02* |                      |                |
|                                            | Ni-M   | 3.45 ± 0.02 <sup>b</sup> | 0.3 ± 0.4 | 0.06 ± 0.02* |                      |                |
| Ni <sub>28</sub> Fe <sub>72</sub>          | Ni-O   | 2.05 ± 0.01              | 6.7 ± 0.5 | 0.08 ± 0.01  | 0.8                  | 23.5           |
|                                            | Ni-M   | 3.07 ± 0.01              | 4.4 ± 0.2 | 0.06 ± 0.02* |                      |                |
|                                            | Ni-M   | 2.86 ± 0.02 <sup>a</sup> | 0.0 ± 0.3 | 0.06 ± 0.02* |                      |                |
|                                            | Ni-M   | 3.45 ± 0.02 <sup>b</sup> | 0.8 ± 0.4 | 0.06 ± 0.02* |                      |                |

\* Debye-Waller parameters of Ni-M shells that had the same value in a global fit approach.

<sup>†</sup> Coordination distances of the Ni-M-M shell were set equal to double the corresponding Ni-M distance.

The distances of two additional Ni-M shells, <sup>a</sup> and <sup>b</sup>, had the same value in all freeze-quenched catalysts in the global fit. Debye-Waller parameters, coordination distances (R) and coordination numbers (CN) were kept unrestricted unless indicated. Catalyst composition is given as atomic %, rounded to the nearest integer.

**Table S6.** Fe *K*-edge EXAFS simulation parameters of catalysts freeze quenched at 1.0 V<sub>RHE</sub> after conditioning at the given potential for 30 min in 0.1 M KOH. The fitted *k*-range was 2.6-12.5 Å<sup>-1</sup>.

| Fe <i>K</i> -edge at 1.0 V <sub>RHE</sub> |        |                   |           |              |                      |                |
|-------------------------------------------|--------|-------------------|-----------|--------------|----------------------|----------------|
| Ni <sub>100-x</sub> Fe <sub>x</sub>       | Shell  | R / Å             | CN        | σ / Å        | ΔE <sub>0</sub> / eV | R <sub>f</sub> |
| Ni <sub>91</sub> Fe <sub>9</sub>          | Fe-O   | 2.01 ± 0.01       | 5.9 ± 0.8 | 0.09 ± 0.01  | 0.4                  | 16.1           |
|                                           | Fe-M   | 3.12 ± 0.01       | 4.9 ± 0.9 | 0.08 ± 0.01* |                      |                |
|                                           | Fe-M-M | 6.24 <sup>†</sup> | 2.1 ± 1.1 | 0.08 ± 0.01* |                      |                |
| Ni <sub>45</sub> Fe <sub>55</sub>         | Fe-O   | 1.99 ± 0.01       | 5.9 ± 0.9 | 0.09 ± 0.01  | 1.0                  | 13.6           |
|                                           | Fe-M   | 3.08 ± 0.01       | 3.5 ± 0.5 | 0.08 ± 0.01* |                      |                |
|                                           | Fe-M-M | 6.16 <sup>†</sup> | 0.9 ± 0.7 | 0.08 ± 0.01* |                      |                |

\* Debye-Waller parameters of Fe-M shells that had the same value in a global fit approach.

<sup>†</sup> Coordination distances of the Fe-M-M shell were set equal to double the corresponding Fe-M distance.

Debye-Waller parameters, coordination distances (R) and coordination numbers (CN) were kept unrestricted unless indicated. Catalyst composition is given as atomic %, rounded to the nearest integer.

**Table S7.** Ni *K*-edge EXAFS simulation parameters of catalysts freeze quenched at 1.0 V<sub>RHE</sub> after conditioning at the given potential for 30 min in 0.1 M KOH. The fitted *k*-range was 2.6-14 Å<sup>-1</sup>.

| Ni <i>K</i> -edge at 1.0 V <sub>RHE</sub> |        |                   |           |              |                      |                |
|-------------------------------------------|--------|-------------------|-----------|--------------|----------------------|----------------|
| Ni <sub>100-x</sub> Fe <sub>x</sub>       | Shell  | R / Å             | CN        | σ / Å        | ΔE <sub>0</sub> / eV | R <sub>f</sub> |
| Ni <sub>100</sub> Fe <sub>0</sub>         | Ni-O   | 2.06 ± 0.01       | 6.0 ± 0.4 | 0.07 ± 0.01  | 3.2                  | 19.5           |
|                                           | Ni-M   | 3.09 ± 0.01       | 6.0 ± 0.4 | 0.06 ± 0.01* |                      |                |
|                                           | Ni-M-M | 6.18 <sup>†</sup> | 2.5 ± 0.5 | 0.06 ± 0.01* |                      |                |
| Ni <sub>91</sub> Fe <sub>9</sub>          | Ni-O   | 2.04 ± 0.01       | 6.2 ± 0.5 | 0.07 ± 0.01  | 1.5                  | 16.3           |
|                                           | Ni-M   | 3.09 ± 0.01       | 5.1 ± 0.3 | 0.06 ± 0.01* |                      |                |
|                                           | Ni-M-M | 6.17 <sup>†</sup> | 1.7 ± 0.5 | 0.06 ± 0.01* |                      |                |
| Ni <sub>45</sub> Fe <sub>55</sub>         | Ni-O   | 2.05 ± 0.01       | 6.2 ± 0.4 | 0.07 ± 0.01  | 2.5                  | 20.7           |
|                                           | Ni-M   | 3.08 ± 0.01       | 6.2 ± 0.7 | 0.06 ± 0.01* |                      |                |
|                                           | Ni-M-M | 6.17 <sup>†</sup> | 2.6 ± 0.4 | 0.06 ± 0.01* |                      |                |

\* Debye-Waller parameters of Ni-M shells that had the same value in a global fit approach.

<sup>†</sup> Coordination distances of the Ni-M-M shell were set equal to double the corresponding Ni-M distance.

Debye-Waller parameters, coordination distances (R) and coordination numbers (CN) were kept unrestricted unless indicated. Catalyst composition is given as atomic %, rounded to the nearest integer.

## S6.2. Structural models

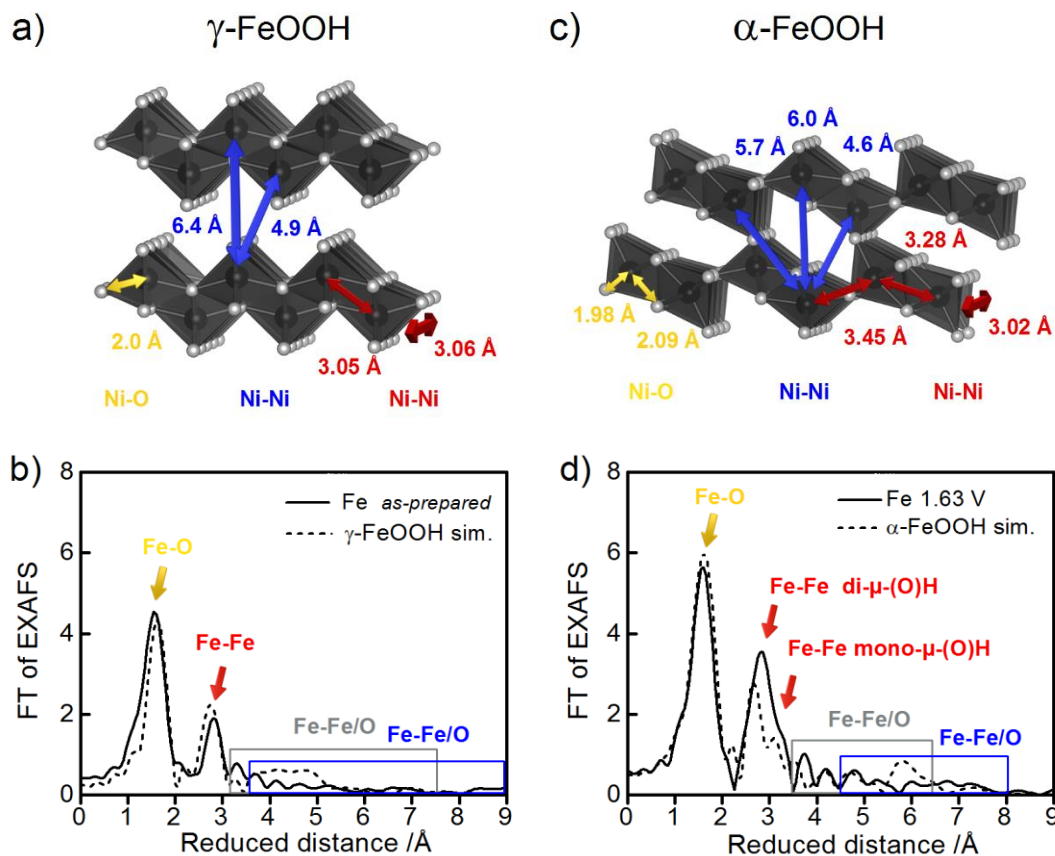

**Figure S20.** Structural models compared to experimental data at the Fe  $K$ -edge. **(a)** Structure of  $\gamma$ -FeOOH (cif 9011314) **(b)** FT-EXAFS of the as-prepared Fe catalyst (solid black line) and the simulated spectrum of  $\gamma$ -FeOOH shown in (a) (dashed black line) **(c)** Structure of  $\alpha$ -FeOOH (cif 1008766) **(d)** FT-EXAFS of the Fe catalyst at 1.63 V; experimental data (solid black line) and the simulated spectrum of  $\alpha$ -FeOOH shown in (c) (dashed black line). The arrows indicate the coordination distances for Fe-O (yellow), Fe-Fe (red), and interlayer distances (blue). The boxes show regions associated with double or multiple scattering. The FT amplitudes of the simulated spectrum of  $\gamma/\alpha$ -FeOOH presented in (b) and (d) have been scaled to fit the experimental.

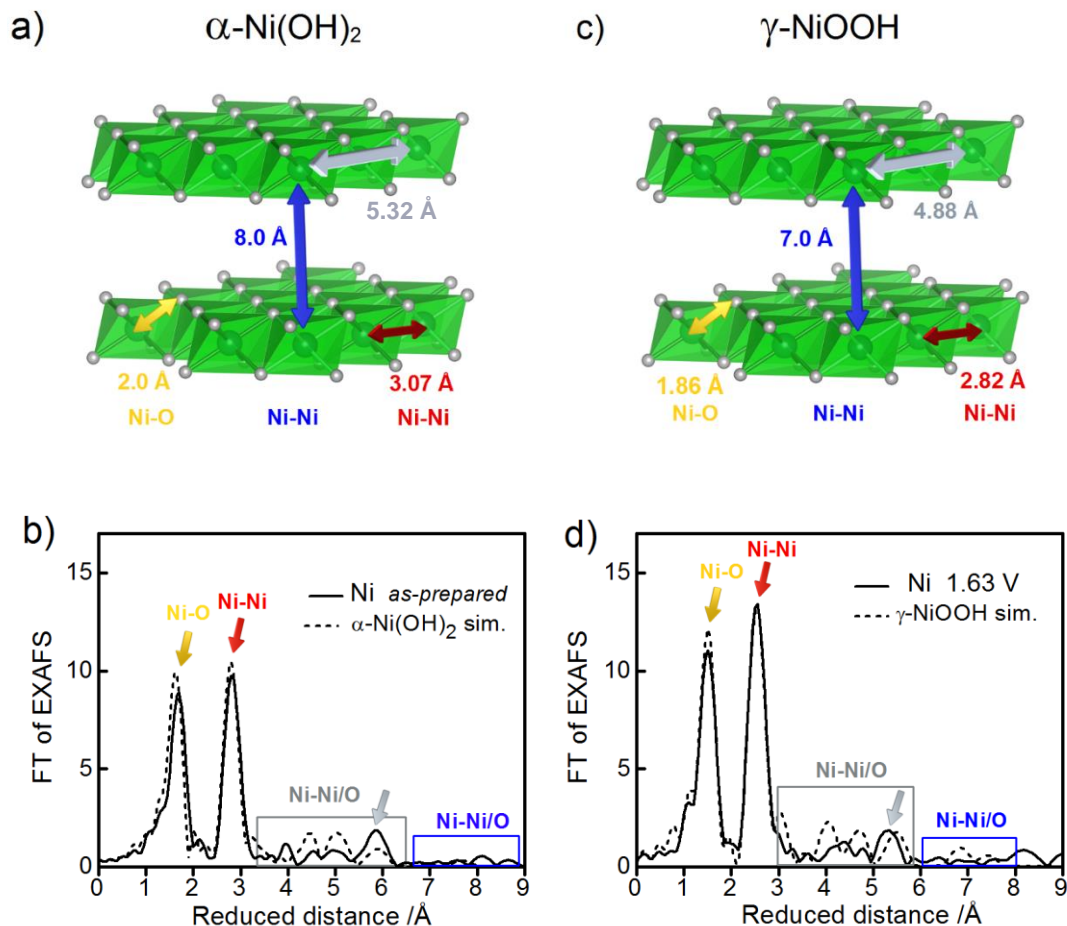

**Figure S21.** Structural models compared to experimental data at the Ni *K*-edge. **(a)** Structure of  $\alpha$ -Ni(OH)<sub>2</sub> (cif 9012316) **(b)** FT-EXAFS of the as-prepared Ni catalyst (solid black line) compared to the simulated spectrum of  $\alpha$ -Ni(OH)<sub>2</sub> shown in (a) (dashed black line). **(c)** The structure  $\gamma$ -NiOOH (cif 9012319) **(d)** FT-EXAFS of the Ni catalyst freeze-quenched at 1.63 V (solid black line) compared to the simulated spectrum of  $\gamma$ -NiOOH shown in (c) (dashed black line). The arrows indicate the coordination distances for Ni-O (yellow), Ni-Ni (red), Ni-Ni double distances (grey), and interlayer distances (blue). The boxes show regions where several distances occur due to presence of double or multiple scattering. The amplitudes of the simulated spectra of  $\alpha$ -Ni(OH)<sub>2</sub> and  $\gamma$ -NiOOH shown in (b) and (d) have been scaled to fit the experimental data.

### S6.3. XAS reference compounds

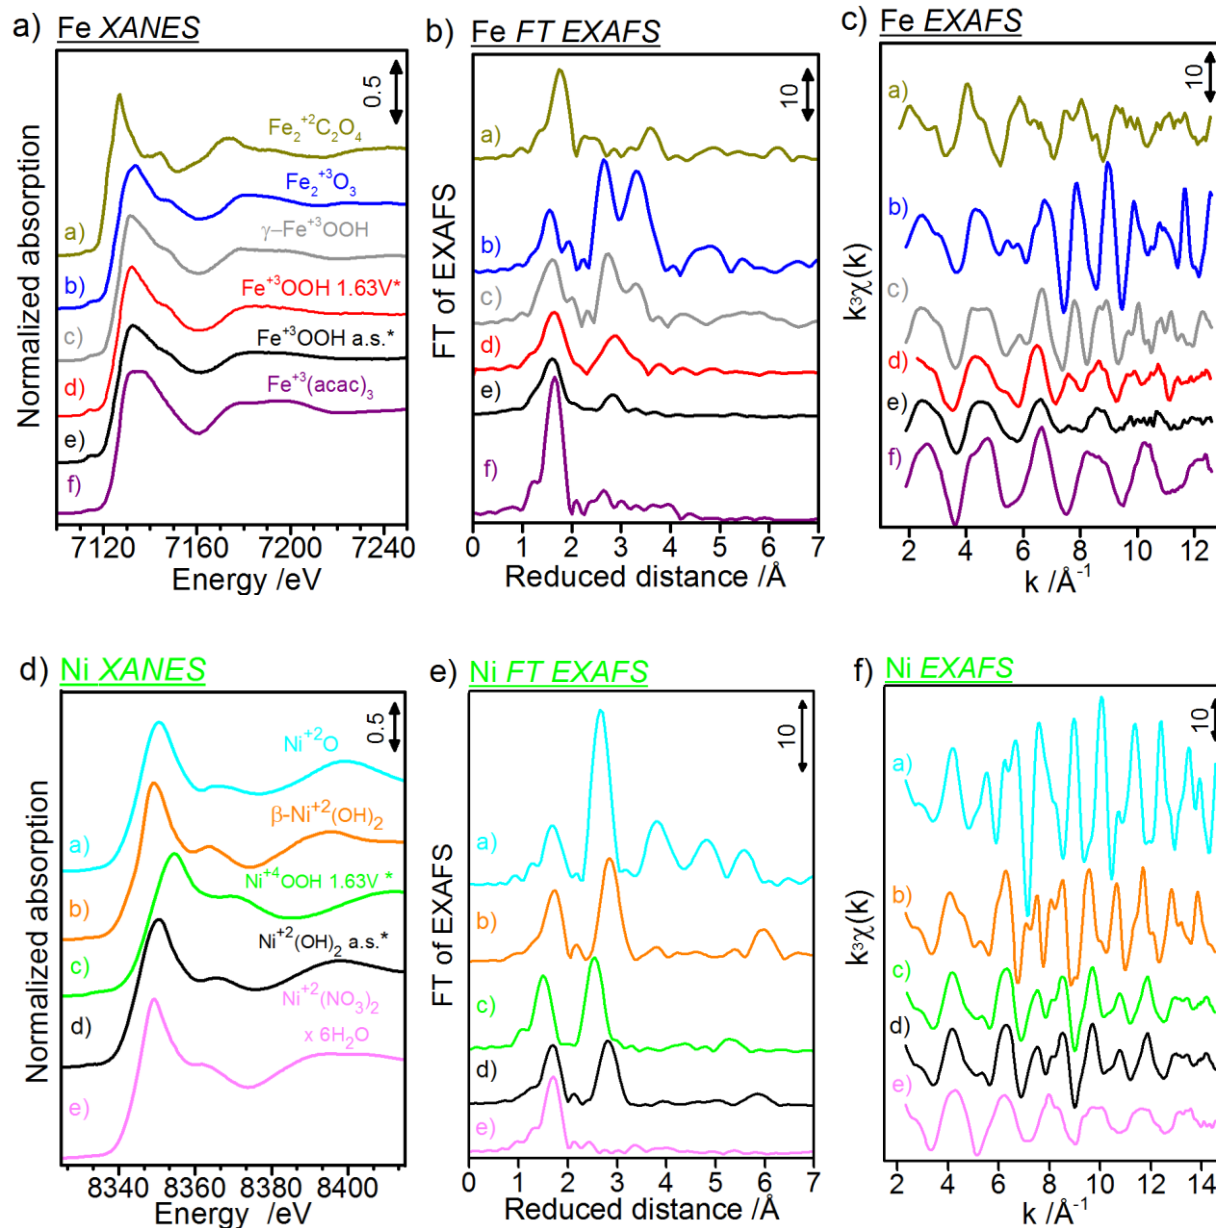

**Figure S22.** XAS spectra of reference compounds measured at the Ni and Fe *K*-edge. **(a-b)** Ni and Fe XANES. **(c-d)** Ni and Fe  $k^3$  weighted EXAFS oscillations,  $k^3\chi(k)$ . **(d-e)** Fourier transformed FT-EXAFS. Shown Fe compounds;  $\text{Fe}_2^{+2}\text{C}_2\text{O}_4$  (ALDRICH),  $\text{Fe}_2^{+3}\text{O}_3$ ,  $\gamma\text{-Fe}^{+3}\text{OOH}$ ,  $\text{Fe}^{+3}\text{OOH}$  1.63V (Fe catalyst at 1.63V, \* this work),  $\text{Fe}^{+3}\text{OOH}$  a.s. (Fe catalyst a.s., \*this work). Shown compounds are  $\text{Ni}^{+2}\text{O}$  (SIGMA-ALDRICH),  $\beta\text{-Ni}^{+2}(\text{OH})_2$  (SIGMA-ALDRICH),  $\text{Ni}^{+4}\text{OOH}$  1.63V\* (Ni catalyst at 1.63V, \*this work), and  $\text{Ni}^{+4}\text{OOH}$  (Ni catalyst a.s. \*this work),  $\text{Ni}^{+2}(\text{NO}_3)_2$  (ALDRICH).

**Table S8.** Summary of literature reported EXAFS parameters for the Fe *K*-edge.

| Compound                        | Ox. state | N | R Fe-O (Å)         | K-edge pos. /eV | Method | Ref           |
|---------------------------------|-----------|---|--------------------|-----------------|--------|---------------|
| FeC <sub>2</sub> O <sub>4</sub> | +2        | 6 | 2.12               | 7120.4          | EXAFS  | <sup>b</sup>  |
| FeO                             | +2        | 6 | 2.120              | -               | EXAFS  | <sup>7</sup>  |
| α-FeOOH                         | +3        | 6 | 2.020              | -               | EXAFS  | <sup>8</sup>  |
| α-FeOOH                         | +3        | 6 | 2.000 <sup>a</sup> | -               | XRD    | <sup>9</sup>  |
| γ-FeOOH                         | +3        | 6 | 2.000              | -               | EXAFS  | <sup>8</sup>  |
| γ-FeOOH                         | +3        | 6 | 2.000              | -               | EXAFS  | <sup>10</sup> |
| FeOOH (Fhyd 2)                  | +3.2      | 6 | 2.000              | -               | EXAFS  | <sup>9</sup>  |
| FeOOH (Fhyd 3)                  | +2.8      | 6 | 2.040              | -               | EXAFS  | <sup>9</sup>  |
| FeOOH (Fhyd 6)                  | +2.8      | 6 | 2.050              | -               | XRD    | <sup>9</sup>  |
| Fe <sub>2</sub> O <sub>3</sub>  | +3        | 6 | 1.98               | 7124.2          | EXAFS  | <sup>b</sup>  |
| Fe <sub>2</sub> O <sub>3</sub>  | +3        | 6 | 2.045              | -               | XRD    | <sup>11</sup> |
| Fe <sub>2</sub> O <sub>3</sub>  | +3        | 6 | 2.020 <sup>a</sup> | -               | EXAFS  | <sup>12</sup> |
| Fe <sub>3</sub> O <sub>4</sub>  | +3        | 5 | 2.018 <sup>a</sup> | -               | EXAFS  | <sup>12</sup> |
| Fe(acac) <sub>3</sub>           | +3        | 6 | 2.0                | 7125.1          | EXAFS  | <sup>b</sup>  |
| SrFeO <sub>3</sub>              | +4        | - | 1.923              | -               | ND     | <sup>13</sup> |
| FeOS                            | +4        | - | 1.670              | -               | EXAFS  | <sup>14</sup> |

<sup>a</sup> The weighted average of the two given Fe-O shells. <sup>b</sup> Reported EXAFS data was measured in this work



**Table S9.** Summary of literature reported EXAFS parameters for the Ni *K*-edge

| Compound                          | Ox. state | N | R Ni-O (Å) | <i>K</i> -edge position (eV) | Method | Ref          |
|-----------------------------------|-----------|---|------------|------------------------------|--------|--------------|
| $\alpha$ -Ni(OH) <sub>2</sub>     | +2        | 6 | 2.050      | -                            | EXAFS  | 15           |
| $\alpha$ -Ni(OH) <sub>2</sub>     | +2        | 6 | 2.050      | -                            | EXAFS  | 10           |
| $\alpha$ -Ni(OH) <sub>2</sub>     | +2        | 6 | 2.037      | -                            | EXAFS  | 16           |
| $\alpha$ -Ni(OH) <sub>2</sub>     | +2        | 6 | 2.050      | -                            | EXAFS  | 17           |
| $\alpha$ -Ni(OH) <sub>2</sub>     | +2        | 6 | 2.040      | -                            | EXAFS  | 18           |
| $\beta$ -Ni(OH) <sub>2</sub>      | +2        | 6 | 2.06       | 8342.7                       | EXAFS  | <sup>b</sup> |
| $\beta$ -Ni(OH) <sub>2</sub>      | +2        | 6 | 2.063      | -                            | EXAFS  | 16           |
| $\beta$ -Ni(OH) <sub>2</sub>      | +2        | 6 | 2.070      | -                            | EXAFS  | 17           |
| $\beta$ -Ni(OH) <sub>2</sub>      | +2        | 6 | 2.060      | -                            | EXAFS  | 18           |
| $\beta$ -Ni(OH) <sub>2</sub>      | +2        | 6 | 2.074      | -                            | EXAFS  | 19           |
| Ni(OH) <sub>2</sub>               | +2        | 6 | 2.050      | 8341.7                       | EXAFS  | 20           |
| Ni(OH <sub>2</sub> ) <sub>6</sub> | +2        | 6 | -          | 8342.9                       | EXAFS  | 21           |
| NiO                               | +2        | 6 | 2.06       | 8342.1                       | EXAFS  | <sup>b</sup> |
| NiO                               | +2        | 6 | 2.090      | -                            | EXAFS  | 22           |
| NiO                               | +2        | 6 | 2.074      | -                            | EXAFS  | 16           |
| NiO                               | +2        | 6 | 2.070      | 8341.9                       | EXAFS  | 20           |
| NiO                               | +2        | 6 | 2.070      | 8342.3                       | EXAFS  | 21           |
| Ni(NO <sub>3</sub> ) <sub>2</sub> | +2        | 6 | 2.05       | 8342.9                       | EXAFS  | <sup>b</sup> |
| $\beta$ -NiOOH                    | +3        | 6 | 1.916      | -                            | EXAFS  | 19           |
| $\beta$ -NiOOH                    | +3.16     | 6 | 1.920      | -                            | EXAFS  | 23           |
| $\beta$ -NiOOH                    | +3.26     | 6 | 1.922      | 8343.9                       | EXAFS  | 21           |
| $\beta$ -NiOOH                    | +3        | 6 | 1.950      | -                            | EXAFS  | 20           |
| $\gamma$ -NiOOH                   | +3.60     | 6 | 1.890      | -                            | EXAFS  | 10           |
| $\gamma$ -NiOOH                   | +3.67     | 6 | 1.860      | -                            | EXAFS  | 17           |
| $\gamma$ -NiOOH                   | +3.67     | 6 | 1.888      | -                            | EXAFS  | 19           |
| $\gamma$ -NiOOH                   | +3.60     | 6 | 1.880      | -                            | EXAFS  | 23           |
| $\gamma$ -NiOOH                   | +3.76     | 6 | 1.880      | 8345.0                       | EXAFS  | 21           |
| KNiIO <sub>6</sub>                | +4        | 6 | 1.876      | 8342.9                       | EXAFS  | 16           |
| KNiIO <sub>6</sub>                | +4        | 6 | 1.870      | 8345.8                       | EXAFS  | 20           |
| KNiIO <sub>6</sub>                | +4        | 6 | 1.873      | -                            | EXAFS  | 24           |

<sup>a</sup> The weighted average of the two given Fe-O shells. <sup>b</sup> Reported EXAFS data was measured in this work

## References

- (1) Batchellor, A. S.; Boettcher, S. W. *ACS Catalysis* **2015**, *5*, 6680.
- (2) Smith, R. D. L.; Berlinguette, C. P. *Journal of the American Chemical Society* **2016**, *138*, 1561.
- (3) Trotochaud, L.; Young, S. L.; Ranney, J. K.; Boettcher, S. W. *Journal of the American Chemical Society* **2014**, *136*, 6744.
- (4) Ankudinov, A. L.; Ravel, B.; Rehr, J. J.; Conradson, S. D. *Physical Review B* **1998**, *58*, 7565.
- (5) Rehr, J. J.; Albers, R. C. *Reviews of Modern Physics* **2000**, *72*, 621.
- (6) Dau, H.; Liebisch, P.; Haumann, M. *Anal Bioanal Chem* **2003**, *376*, 562.
- (7) Thorat, S.; Rose, J.; Garnier, J. M.; Van Geen, A.; Refait, M. P.; Traverse, A.; Fonda, E.; Nahon, D.; Bottero, J. Y. *Environ Sci Technol* **2005**, *39*, 9478.
- (8) Suzuki, S.; Suzuki, T.; Kimura, M.; Takagi, Y.; Shinoda, K.; Tohji, K.; Waseda, Y. *Applied Surface Science* **2001**, *169–170*, 109.
- (9) Manceau, A.; Schlegel, M. L.; Musso, M.; Sole, V. A.; Gauthier, C.; Petit, P. E.; Trolard, F. *Geochimica et Cosmochimica Acta* **2000**, *64*, 3643.
- (10) Friebel, D.; Louie, M. W.; Bajdich, M.; Sanwald, K. E.; Cai, Y.; Wise, A. M.; Cheng, M.-J.; Sokaras, D.; Weng, T.-C.; Alonso-Mori, R.; Davis, R. C.; Bargar, J. R.; Nørskov, J. K.; Nilsson, A.; Bell, A. T. *Journal of the American Chemical Society* **2015**, *137*, 1306.
- (11) Fleet, M. *Acta Crystallographica Section B* **1981**, *37*, 917.
- (12) Corrias, A.; Ennas, G.; Mountjoy, G.; Paschina, G. *Physical Chemistry Chemical Physics* **2000**, *2*, 1045.
- (13) Hodges, J. P.; Short, S.; Jorgensen, J. D.; Xiong, X.; Dabrowski, B.; Mini, S. M.; Kimball, C. W. *Journal of Solid State Chemistry* **2000**, *151*, 190.
- (14) Krest, C. M.; Silakov, A.; Rittle, J.; Yosca, T. H.; Onderko, E. L.; Calixto, J. C.; Green, M. T. *Nat Chem* **2015**, *7*, 696.
- (15) Balasubramanian, M.; Melendres, C. A.; Mini, S. *The Journal of Physical Chemistry B* **2000**, *104*, 4300.
- (16) Mansour, A. N.; Melendres, C. A. *The Journal of Physical Chemistry A* **1998**, *102*, 65.
- (17) Capehart, T. W.; Corrigan, D. A.; Conell, R. S.; Pandya, K. I.; Hoffman, R. W. *Applied Physics Letters* **1991**, *58*, 865.
- (18) Pandya, K. I.; Ogrady, W. E.; Corrigan, D. A.; McBreen, J.; Hoffman, R. W. *Journal of physical chemistry (1952)* **1990**, *94*, 21.
- (19) Morishita, M.; Ochiai, S.; Takeya, T.; Ozaki, T.; Kawabe, Y.; Watada, M.; Tanase, S.; Sakai, T. *Journal of the Electrochemical Society* **2008**, *155*, 936.
- (20) Farley, N. R. S.; Gurman, S. J.; Hillman, A. R. *Electrochimica Acta* **2001**, *46*, 3119.
- (21) Risch, M.; Klingan, K.; Heidkamp, J.; Ehrenberg, D.; Chernev, P.; Zaharieva, I.; Dau, H. *Chemical Communications* **2011**, *47*, 11912.

- (22) Fominykh, K.; Chernev, P.; Zaharieva, I.; Sicklinger, J.; Stefanic, G.; Döblinger, M.; Müller, A.; Pokharel, A.; Böcklein, S.; Scheu, C.; Bein, T.; Fattakhova-Rohlfing, D. *ACS Nano* **2015**, 9, 5180.
- (23) Bediako, D. K.; Lassalle-Kaiser, B.; Surendranath, Y.; Yano, J.; Yachandra, V. K.; Nocera, D. G. *Journal of the American Chemical Society* **2012**, 134, 6801.
- (24) Currie, D. B.; Levason, W.; Oldroyd, R. D.; Weller, M. T. *Journal of the Chemical Society, Dalton Transactions* **1994**, 1483.
